# Supplementary material for: A theoretical study on the activity and selectivity of IDO/TDO inhibitors
Source: Royal Society of Chemistry journal article supplement (doi:10.1039/d3cp06036e), 2024-01-01
Supplement: d3cp06036e1.pdf [file d3cp06036e1.pdf]

**Supporting Information for:**  
**Theoretical study on the activity and selectivity of IDO / TDO**  
**inhibitors**

Baerlike Wujieti, Xinpeng Feng, Erxia Liu, Deqing Li, Mingtian Hao, Luqi Zhou, Wei Cui\*

School of Chemical Sciences, University of Chinese Academy of Sciences, No. 19A, YuQuan Road,  
Beijing 100049, China.

\*Corresponding author

Email address: cuiwei@ucas.ac.cn

## Contents

|                                                                                                                                                |    |
|------------------------------------------------------------------------------------------------------------------------------------------------|----|
| Figure S1: Identical (A) and different (B) residues at topologically equivalent sites of IDO and TDO. ....                                     | 4  |
| Figure S2: Structure and activity data for various inhibitors. ....                                                                            | 5  |
| Figure S3: Docking conformations of various inhibitors with IDO and TDO. ....                                                                  | 6  |
| Figure S4: Alignment of the predicted complex structure of IDO and their co-crystal structure. ....                                            | 7  |
| Figure S5: The RMSD value of the trajectory of each enzyme-inhibitor complex ..                                                                | 8  |
| Figure S6: The EP <sub>tot</sub> of the trajectory of each enzyme-inhibitor complex. ....                                                      | 9  |
| Figure S7: The RMSF value of the residue's Ca atom of each IDO-inhibitor complex. ....                                                         | 10 |
| Figure S8: The RMSF value of the residue's Ca atom of each TDO-inhibitor complex. ....                                                         | 12 |
| Figure S9: Frequency distribution of the iron-coordinating distance for each enzyme-inhibitor complex. ....                                    | 13 |
| Figure S10: Binding conformations of various inhibitors and two enzymes with the lowest potential energy in stable segment trajectory. ....    | 15 |
| Figure S11: The direction of motion of JKloops of two enzymes along the eigenvectors of the first two principal components (PC1 and PC2). .... | 16 |
| Figure S12: The representative conformations of Trp- and C1 inhibitor-bound IDO/TDO. ....                                                      | 17 |

|                                                                                                                                                                                                                                                  |    |
|--------------------------------------------------------------------------------------------------------------------------------------------------------------------------------------------------------------------------------------------------|----|
| Figure S13: Molecular tunnel scanning results of IDO and TDO. ....                                                                                                                                                                               | 18 |
| Table S1: The volume and surface area of the active pockets of IDO and TDO....                                                                                                                                                                   | 19 |
| Table S2: Hydrogen bond analysis of each IDO- and TDO-inhibitor complex. ....                                                                                                                                                                    | 21 |
| Table S3: Cluster analysis results of T-REMD simulation trajectories (T=300.5K)<br>of Trp-bound and inhibitor-bound IDO/TDO.....                                                                                                                 | 23 |
| Table S4: The binding free energies of the inhibitor with each representative<br>conformation of IDO/TDO, the volume and surface area of the IDO/TDO<br>active pocket, and the solvent-accessible surface area (SASA) of the inhibitor.<br>..... | 25 |
| Table S5: The size and bottleneck of each molecular tunnel of IDO and TDO. ....                                                                                                                                                                  | 26 |
| Table S6: Information on the charge and GAFF force field atom types of the<br>inhibitor, porphyrin ring, histidine, and central iron atoms of the metal<br>coordination structure in the C1 inhibitor-IDO complex.....                           | 27 |
| Table S7: Bond, angle and dihedral angle parameters of metal coordination<br>structures in the C1 inhibitor-IDO complex. ....                                                                                                                    | 30 |
| Table S8: Additional dihedral angle parameters of the inhibitor and porphyrin ring<br>in the C1 inhibitor-IDO complex.....                                                                                                                       | 35 |

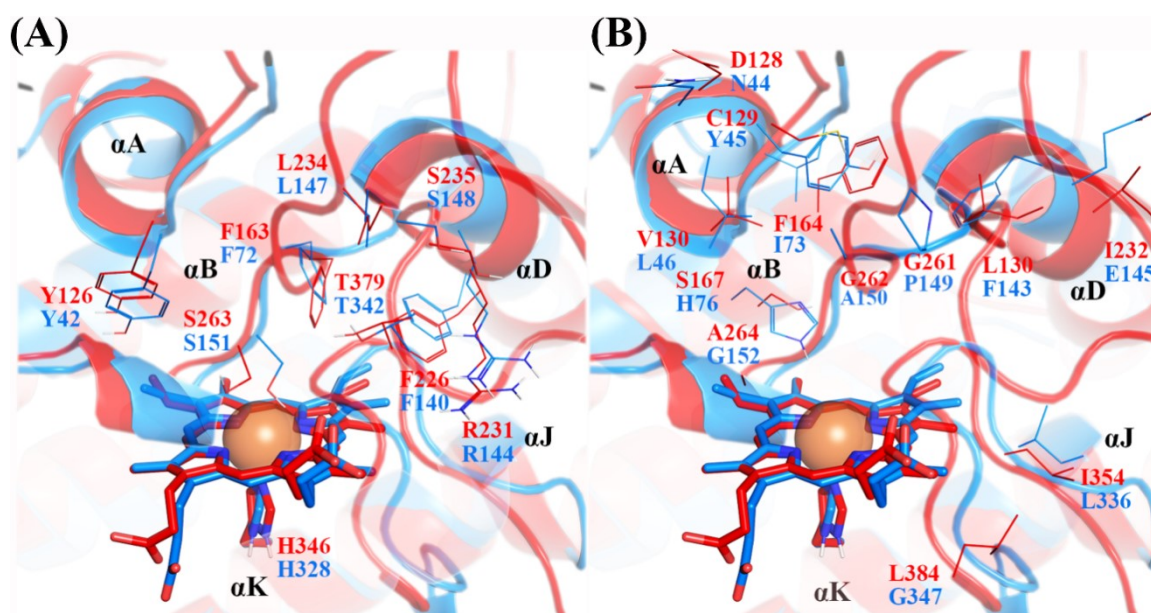

Figure S1: Identical (A) and different (B) residues at topologically equivalent sites of IDO and TDO. In Figures (A) and (B), IDO and its residues at the active site are shown as the red Cartoon model and the red line model, TDO and its residues at the active site are shown as the blue Cartoon model and the blue line model.

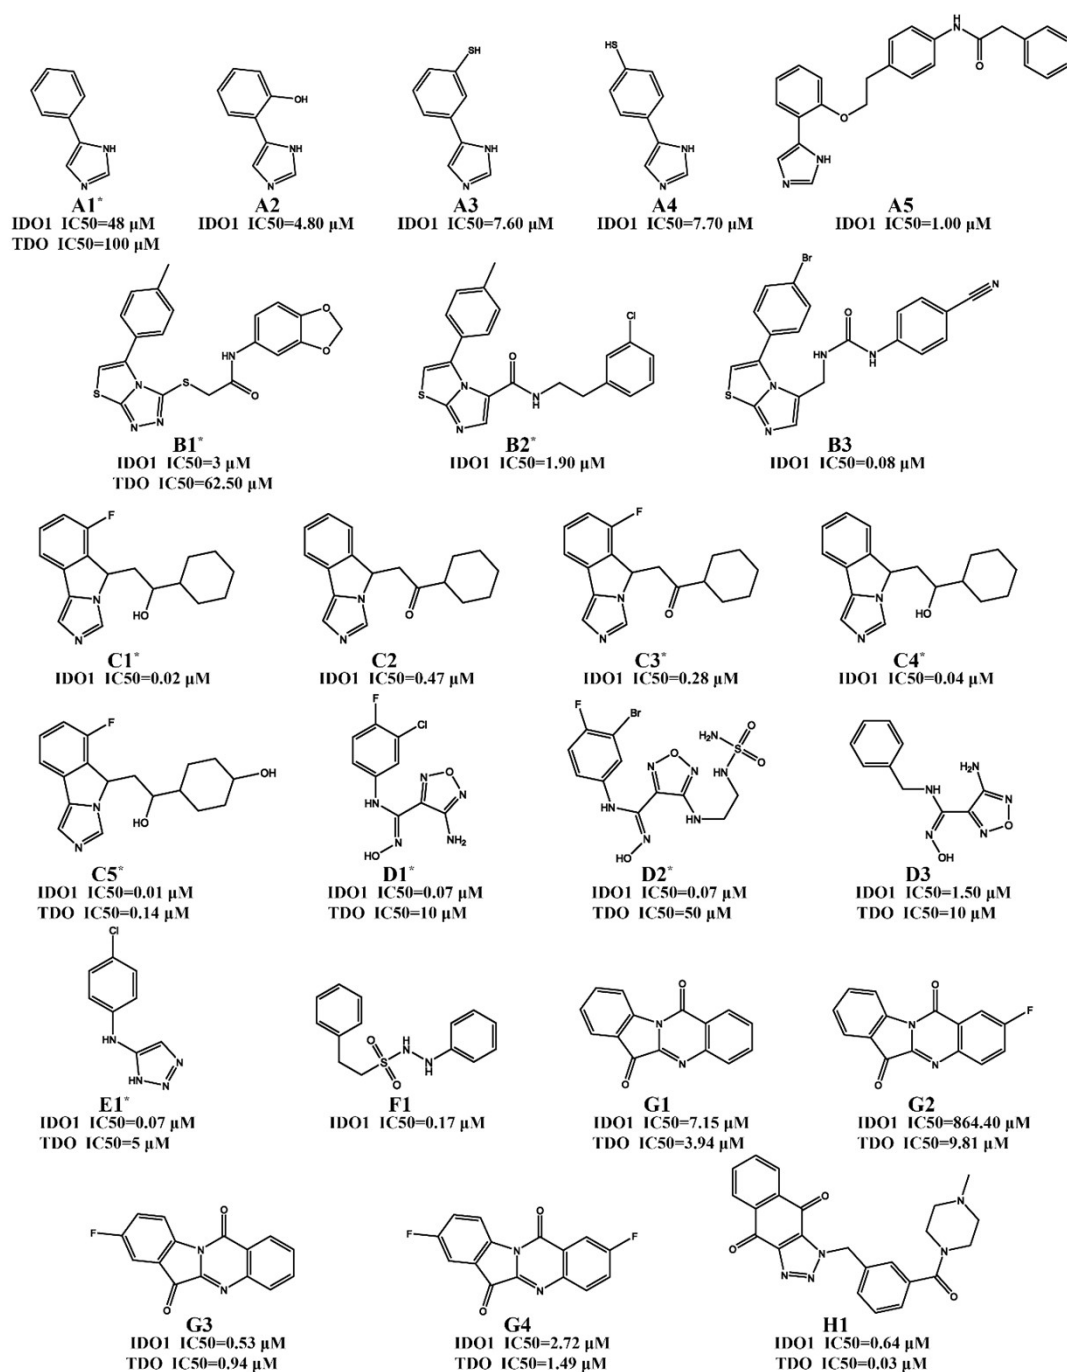

Figure S2: Structure and activity data for various inhibitors. Inhibitors marked with

"\*" have a co-crystal structure with IDO.

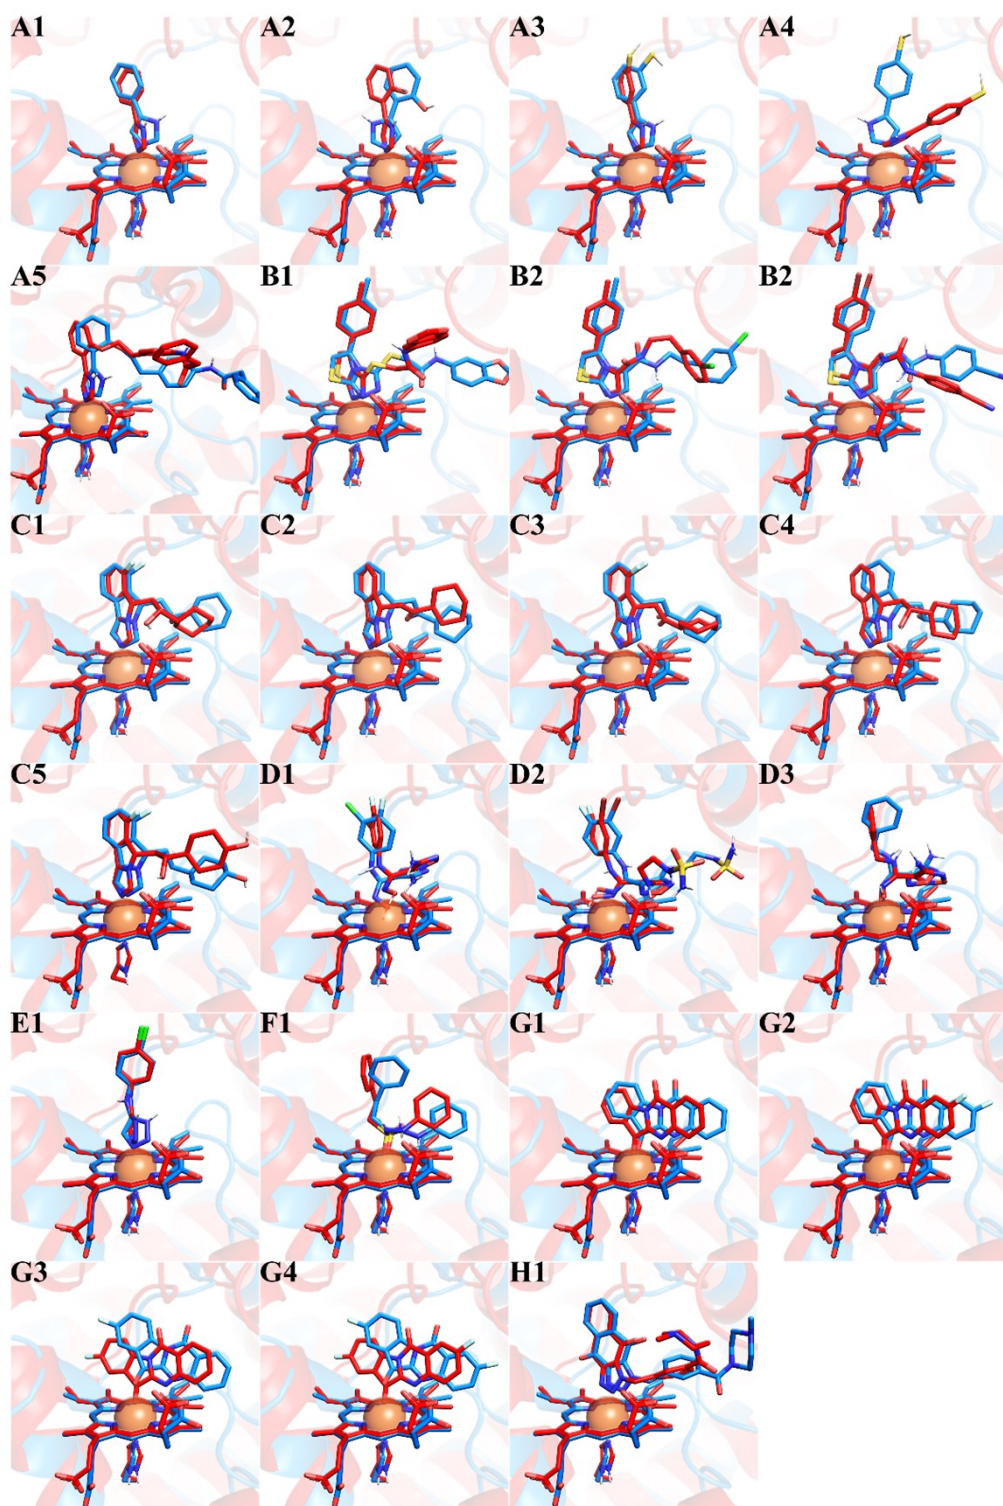

Figure S3: Docking conformations of various inhibitors with IDO and TDO. The predicted binding models of the inhibitor to IDO and TDO are shown by the red stick model and the blue stick model, respectively.

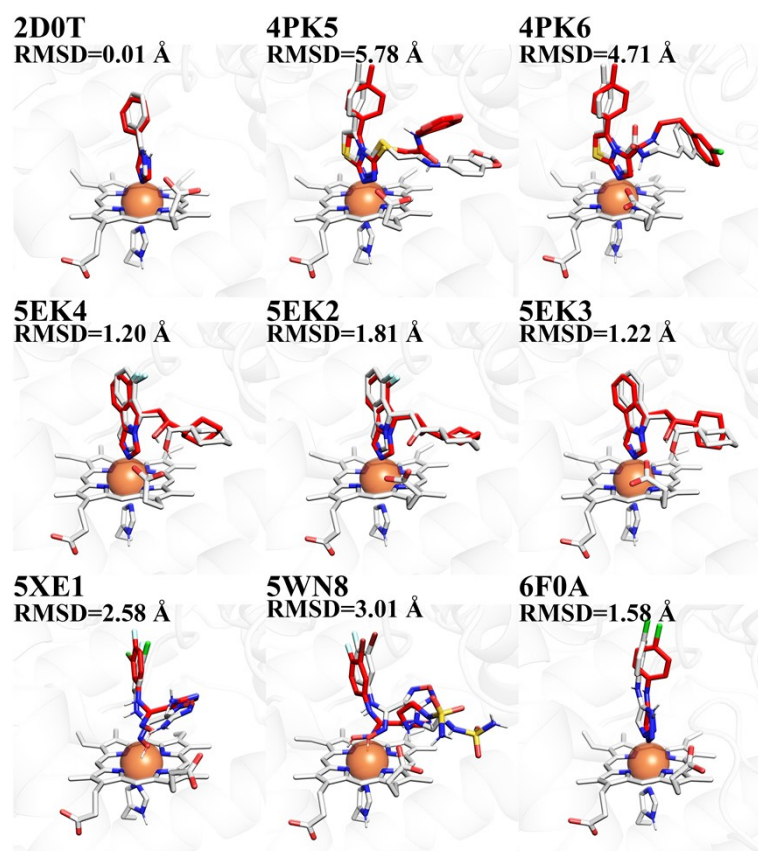

Figure S4: Alignment of the predicted complex structure of IDO and their co-crystal structure. The RMSD values between the IDO-predicted complex structure and the co-crystal structure are labeled in the figure. The white stick and cartoon models show the co-crystal structure, while the red sticks show the corresponding predicted complex structures.

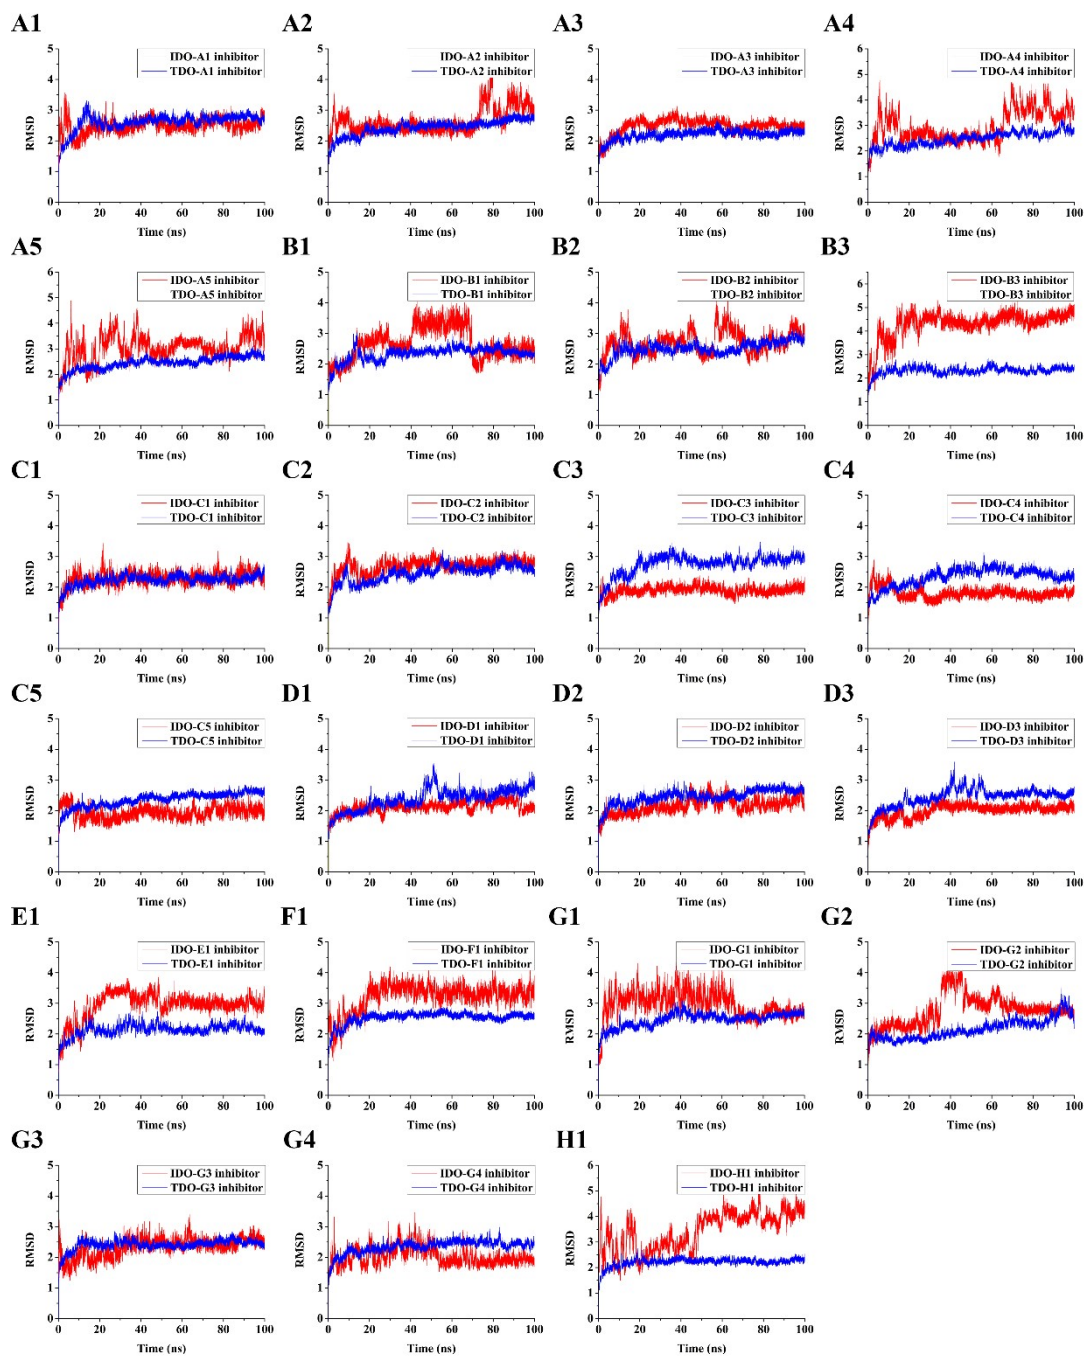

Figure S5: The RMSD value of the trajectory of each enzyme-inhibitor complex with respect to the first frame.

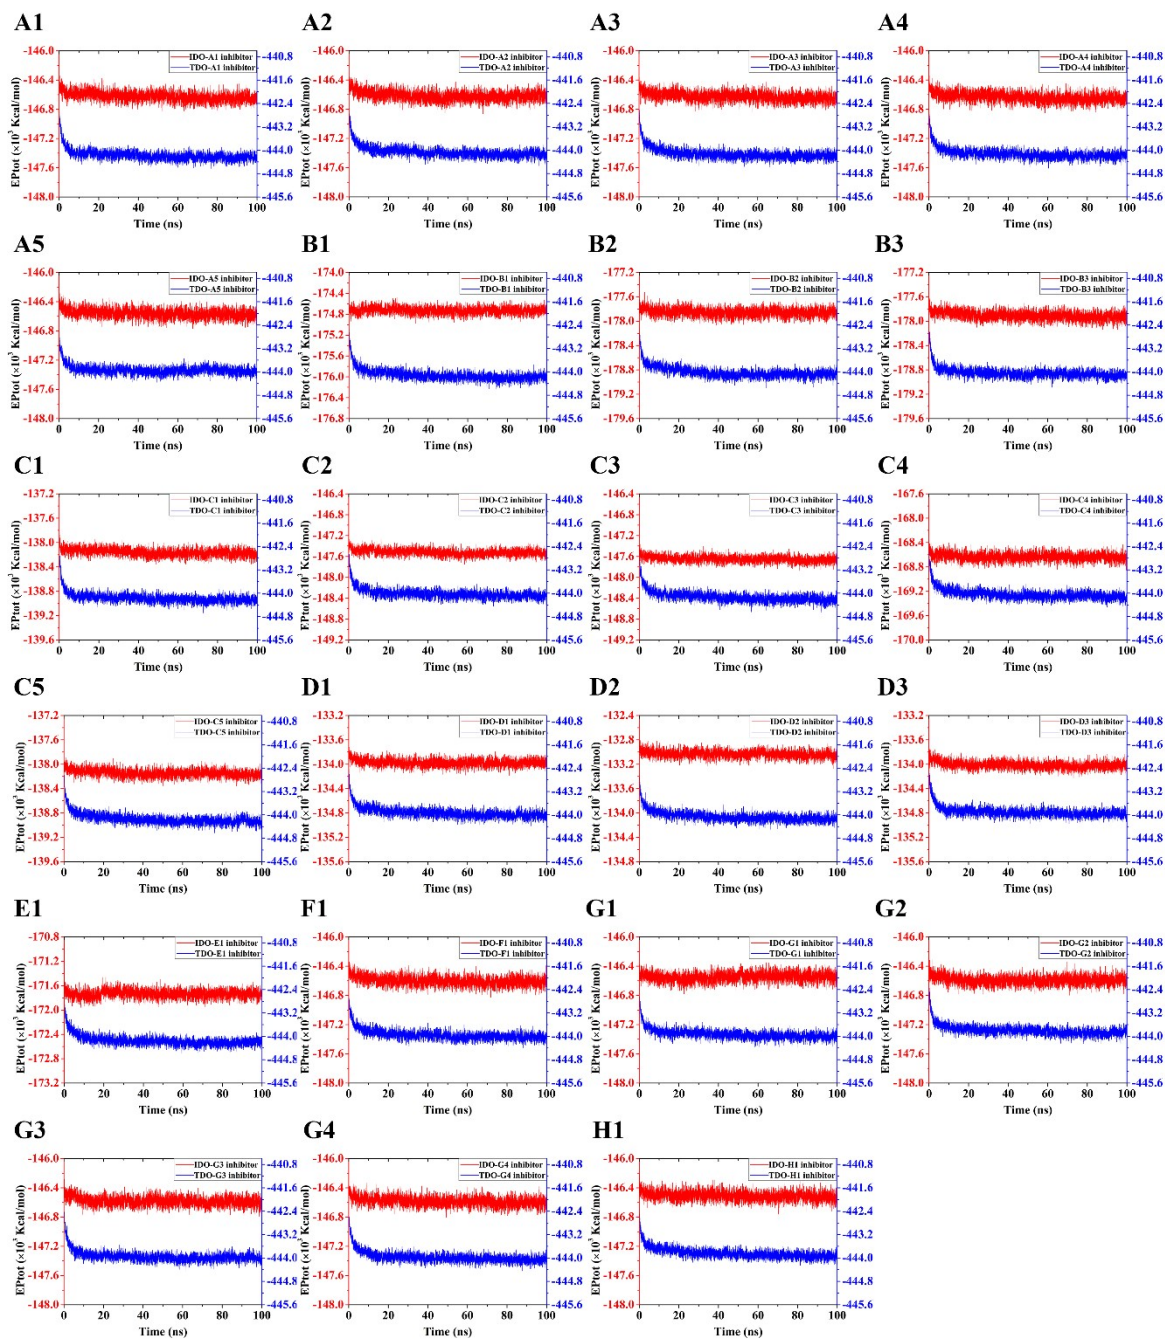

Figure S6: The EP<sub>tot</sub> of the trajectory of each enzyme-inhibitor complex.

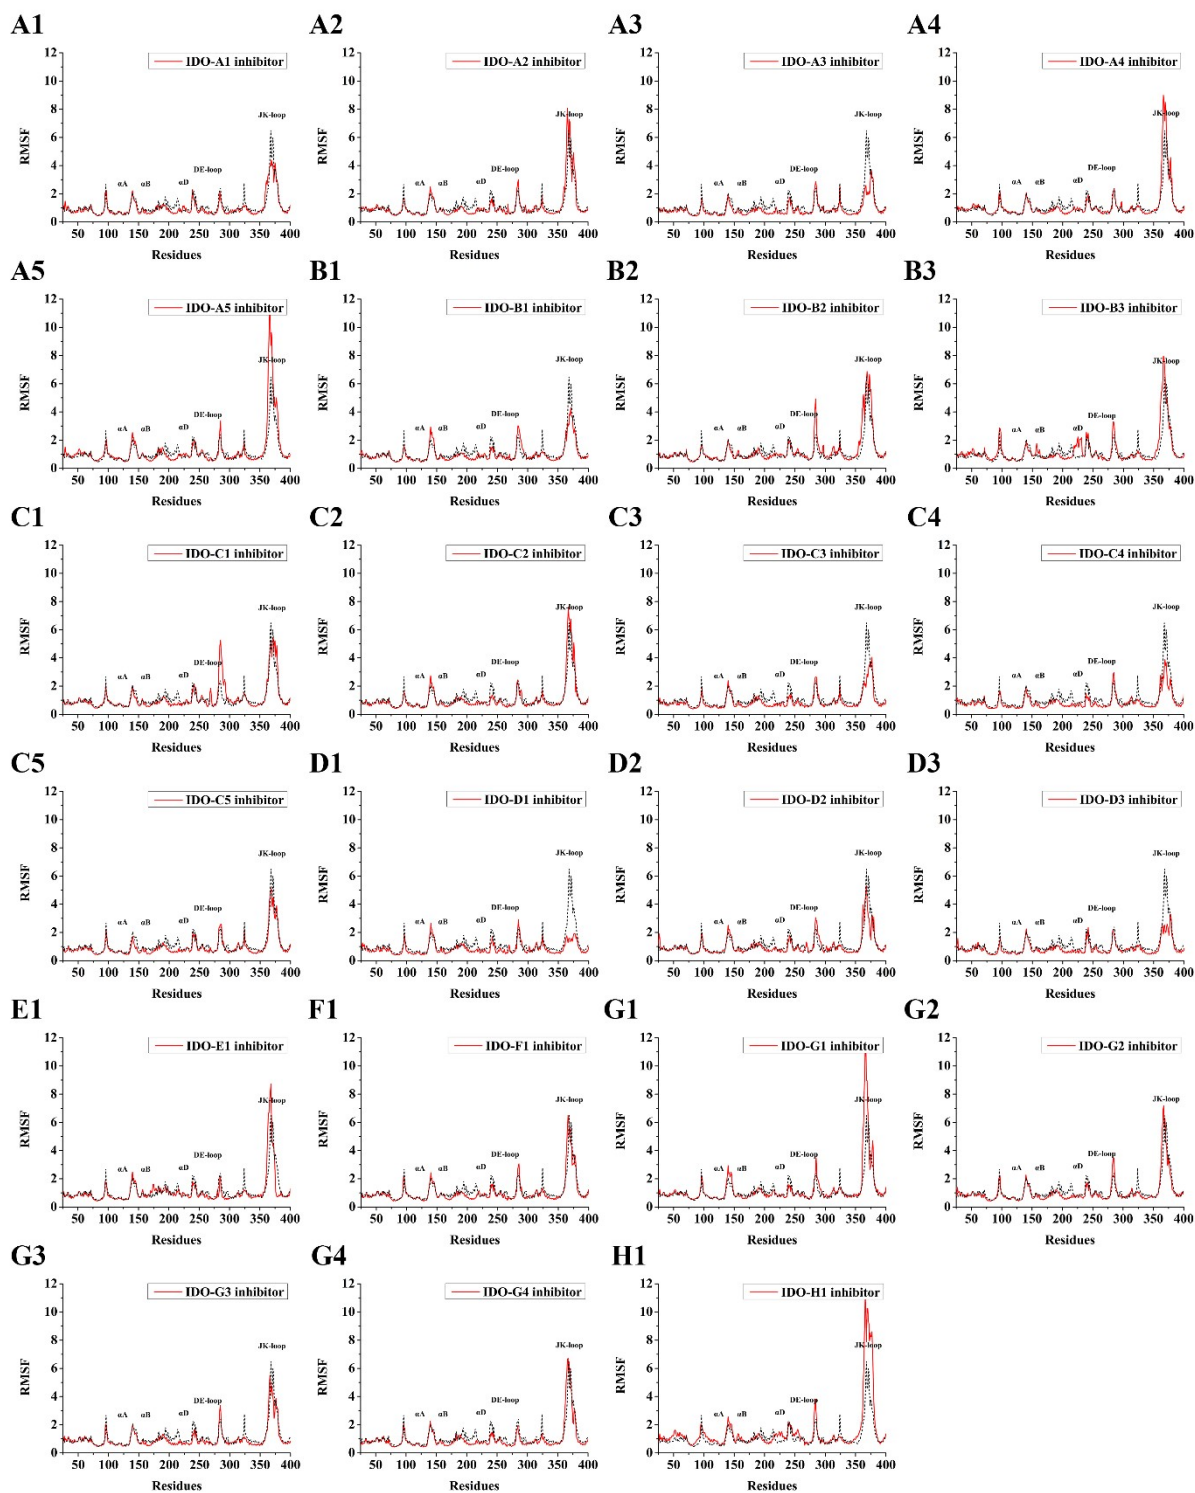

Figure S7: The RMSF value of the residue's Ca atom of each IDO-inhibitor complex.

To determine the flexibility of the secondary structural segments of two enzymes, we calculated the RMSF value of each residue (Ca atom) (The calculation results of the

RMSF value of TDO complex are shown in Supplemental Figures S8). More structural fluctuation and high flexibility were found at the JKloop of IDO complex and the  $\alpha$ H1~ $\alpha$ H2 of TDO complex. In contrast, the JKloop of most TDO complexes has less structural fluctuation and flexibility. Snapshots of complex trajectories show that whether the initial structure is closed or open, the JKloop in most IDO trajectories will eventually switch to the open state, while the JKloop of most TDO complexes remains stable in the closed state. Although the  $\beta$ -turn that maintains the closed conformation of JKloop is disrupted in some larger inhibitor complexes, the JKloop of TDO can still interact with the inhibitor to remain stable. Therefore, the JKloop of TDO has less structural fluctuation and flexibility. In addition, the  $\alpha$ H1~ $\alpha$ H2 is only present in TDO but not in IDO, and its structural fluctuations only reflect the relative motion between the four subunits of TDO.

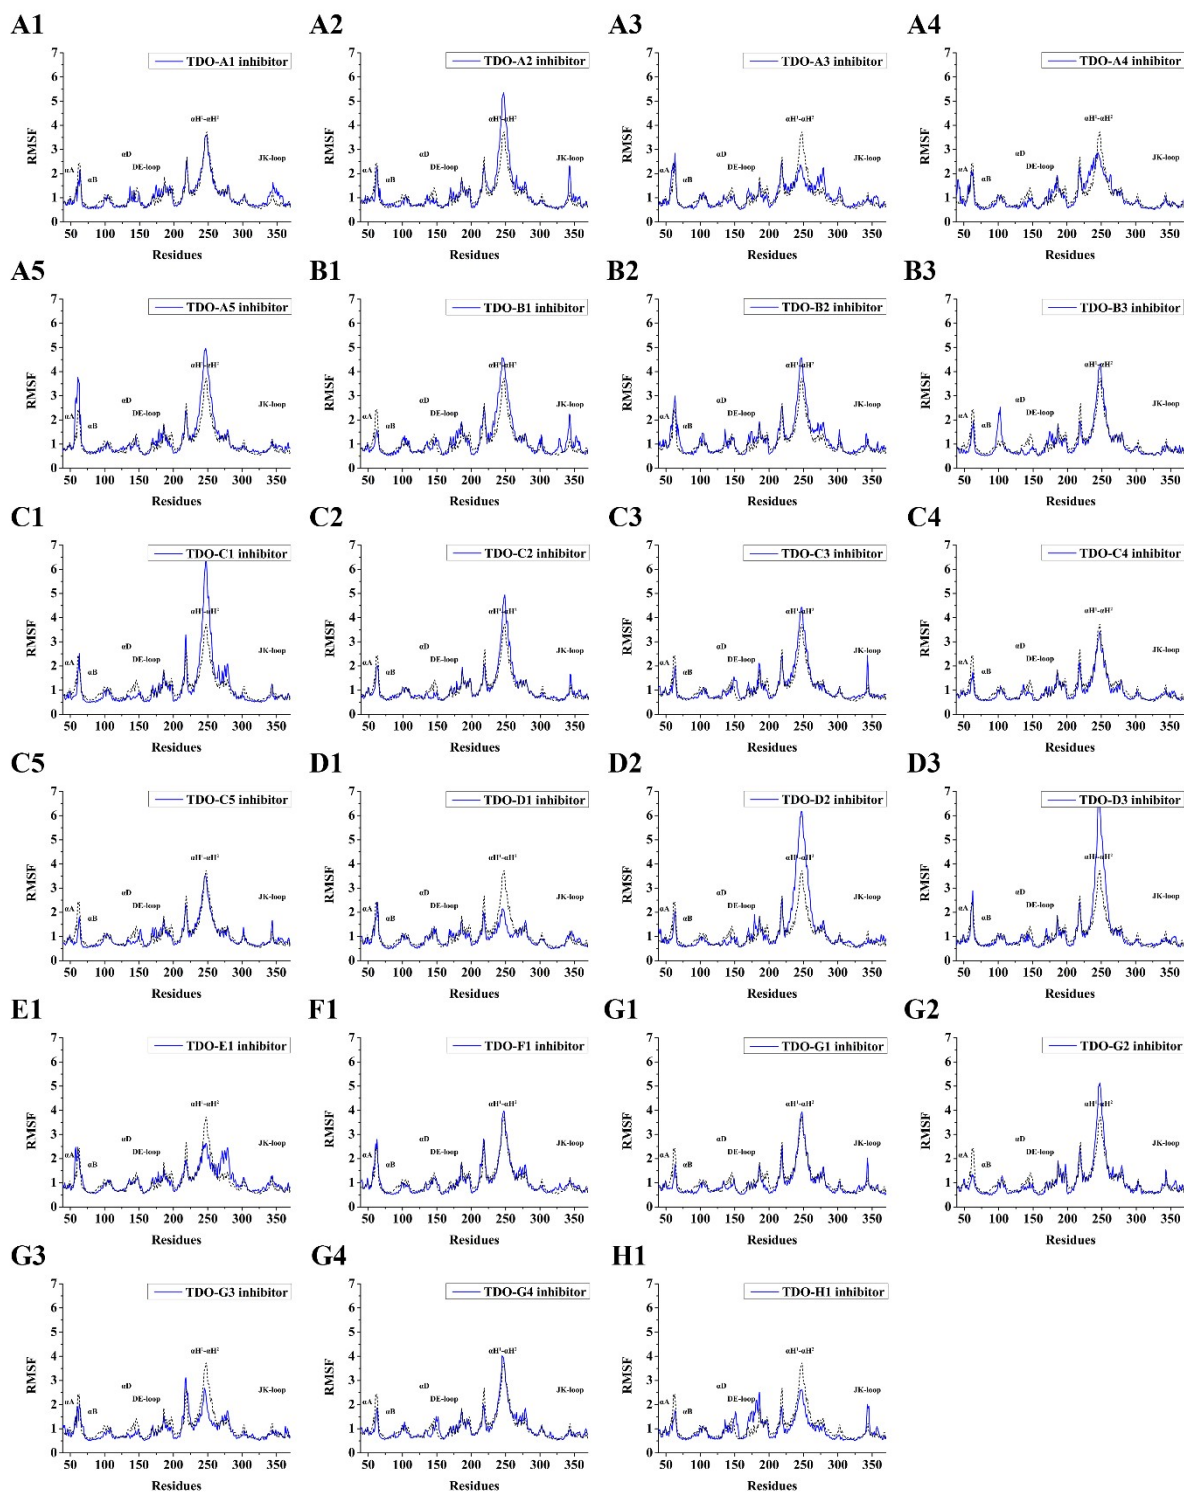

Figure S8: The RMSF value of the residue's Ca atom of each TDO-inhibitor complex.

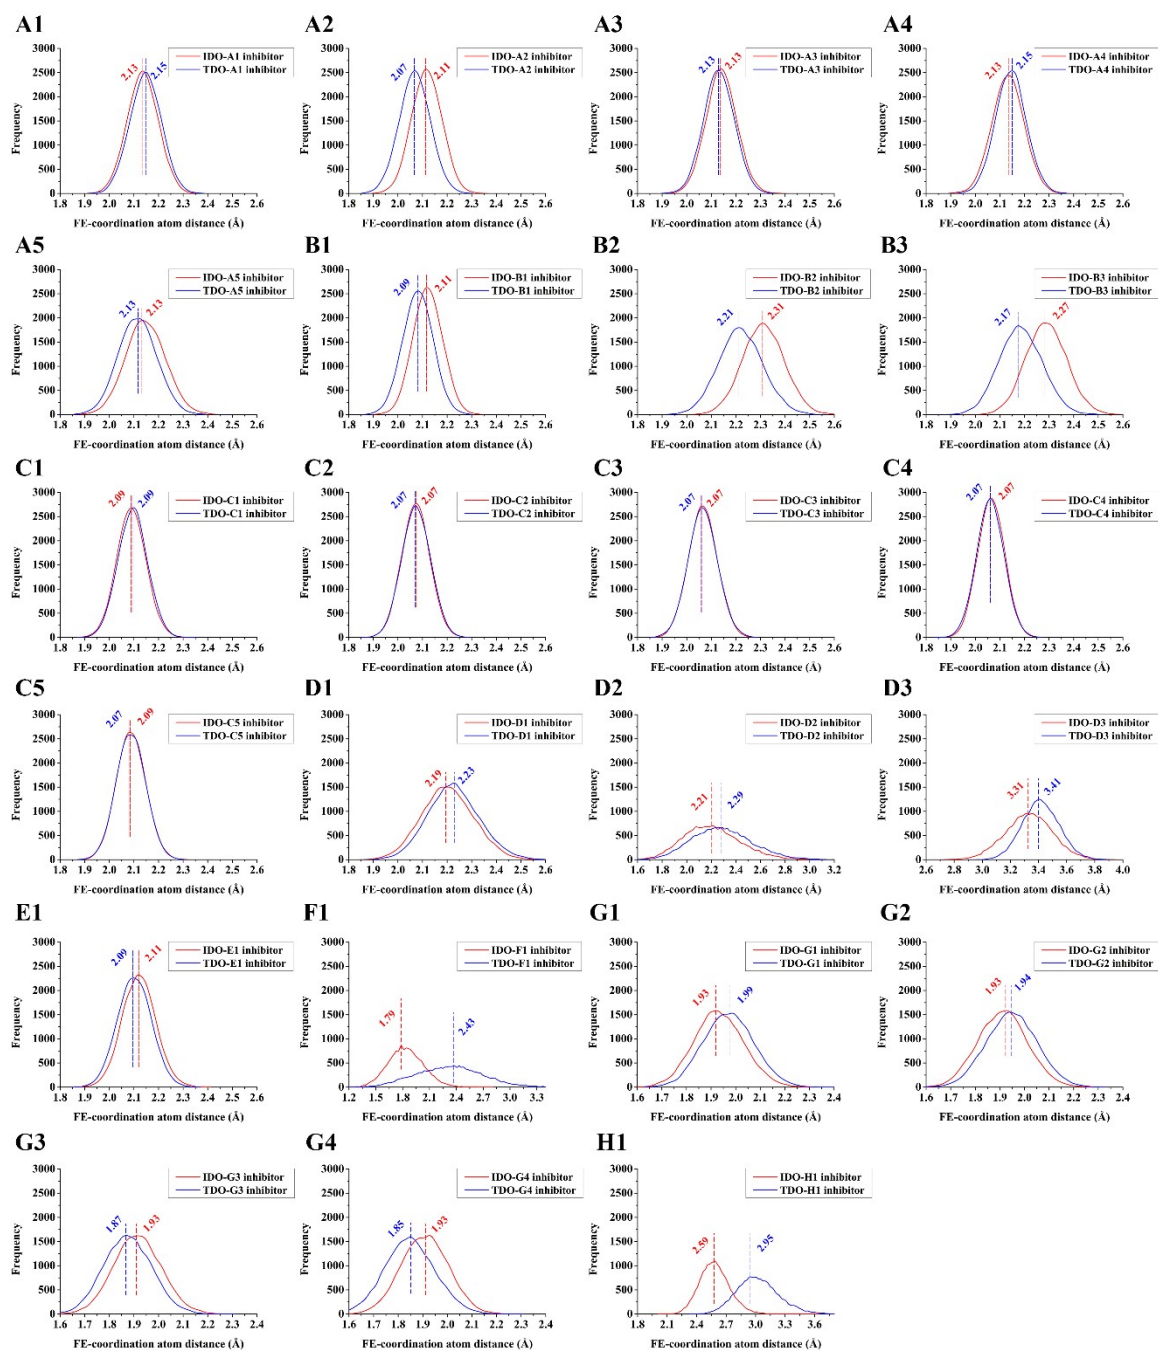

Figure S9: Frequency distribution of the iron-coordinating distance for each enzyme-inhibitor complex. To evaluate the differences in inhibitor coordination between two enzymes, we calculated the frequency distribution of inhibitor coordination distances based on the 80-100 ns MD trajectory of each complex. The coordination distances of most inhibitors in two enzymes converged between 1.85 and 2.29 Å. For the A, C, and

E series inhibitors, the difference in the coordination distances between the two enzymes was no more than 0.04 Å. Considering that the difference in bond length from 0 to 0.04 Å was very small for molecular dynamics simulations, it could be assumed that these three series inhibitors form coordination bonds with the same strength at the active sites of two enzymes. For most inhibitors of B, D, and G series, the difference in the coordination distances between two enzymes was between 0.04 and 0.10 Å, suggesting that these three series inhibitors would form coordination bonds of different strengths at the active sites of two enzymes: B series inhibitors and G series inhibitors substituted by the 8-position F atom (G3 and G4) had stronger coordination bonds in TDO; D series inhibitors and G1 inhibitor without 8-F atom substitution had stronger coordination bonds in IDO.

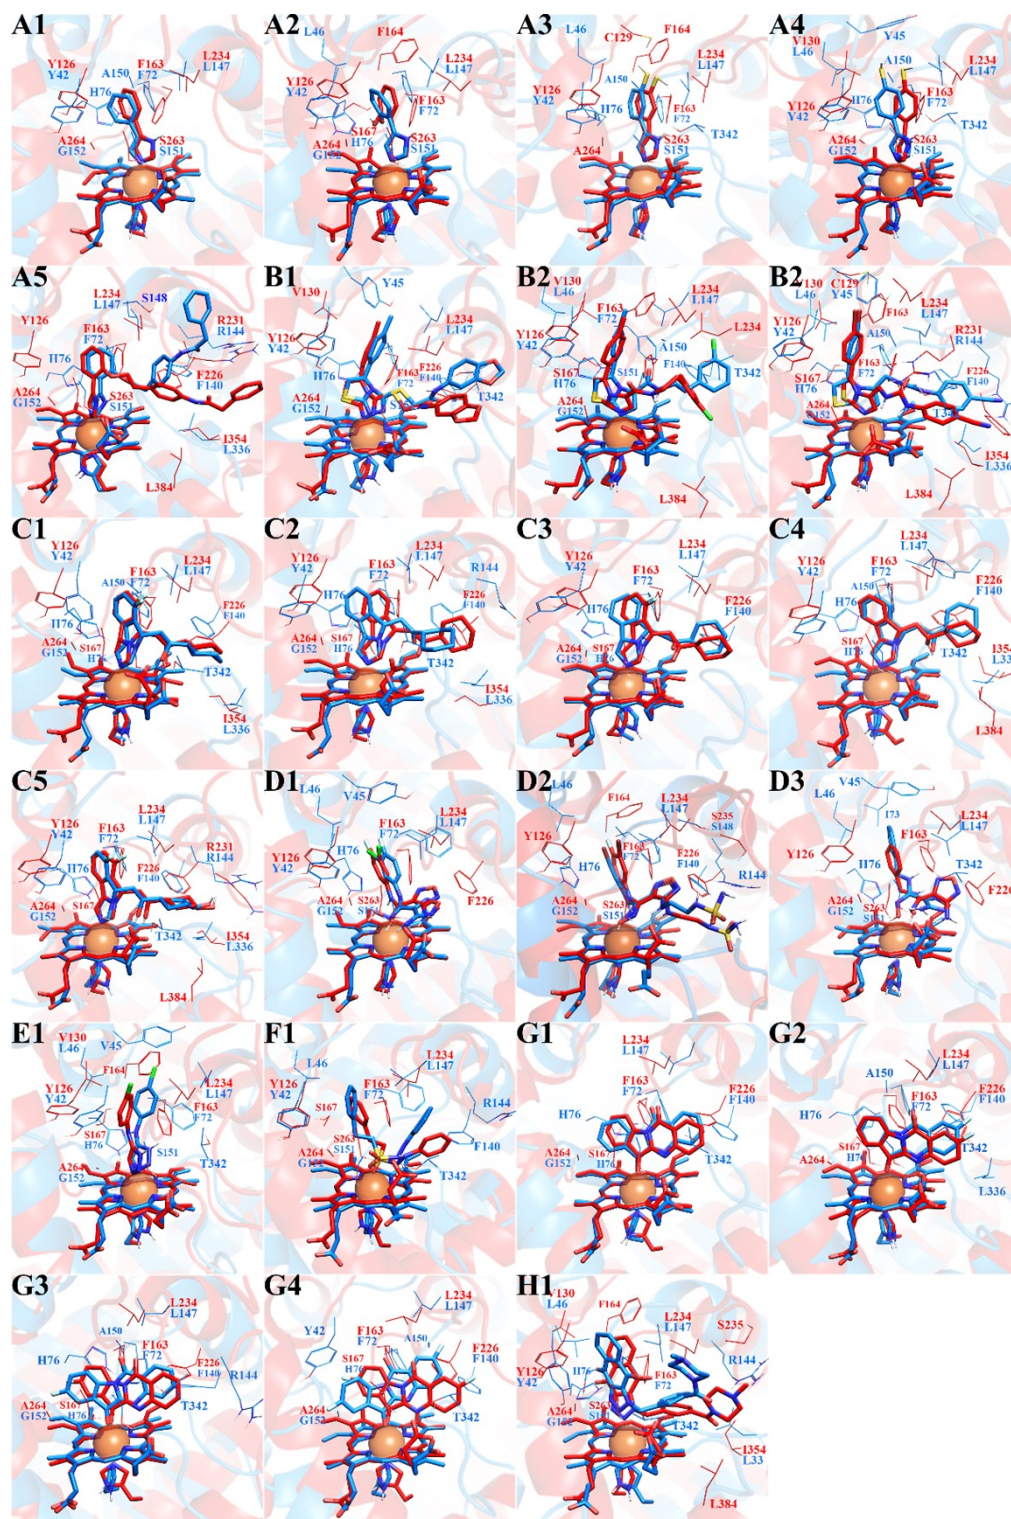

Figure S10: Binding conformations of various inhibitors and two enzymes with the lowest potential energy in stable segment trajectory. The residues of IDO (Red) and TDO (Blue) both contribute less than  $-0.60$  kcal/mol to the binding free energy.

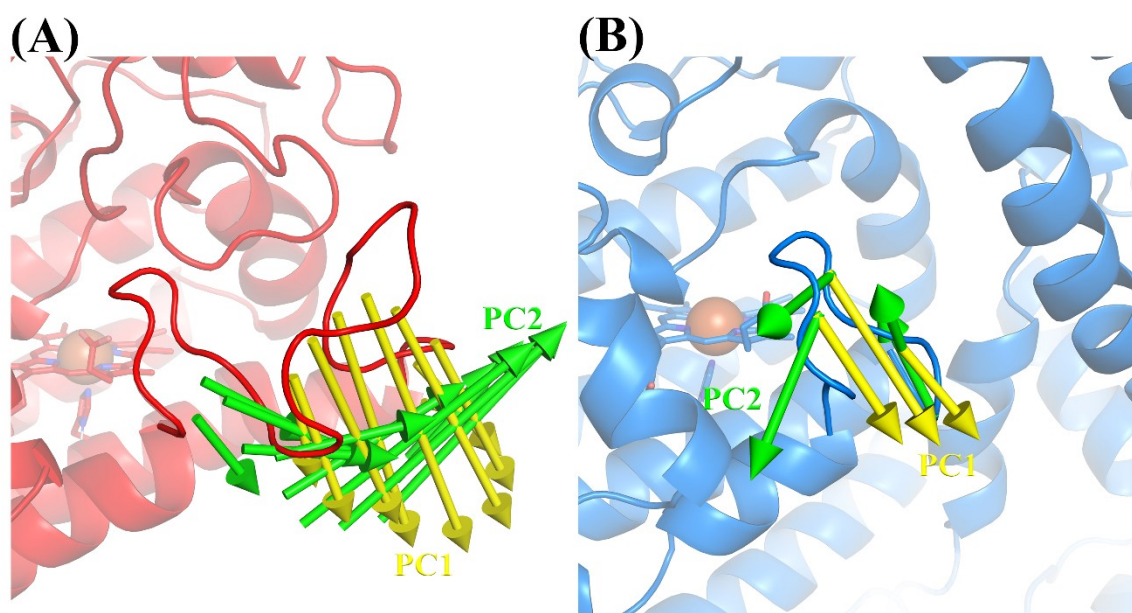

Figure S11: The direction of motion of JKloops of two enzymes along the eigenvectors of the first two principal components (PC1 and PC2). In Figures (A) and (B), IDO and TDO are shown as red cartoon models and blue cartoon models, respectively.

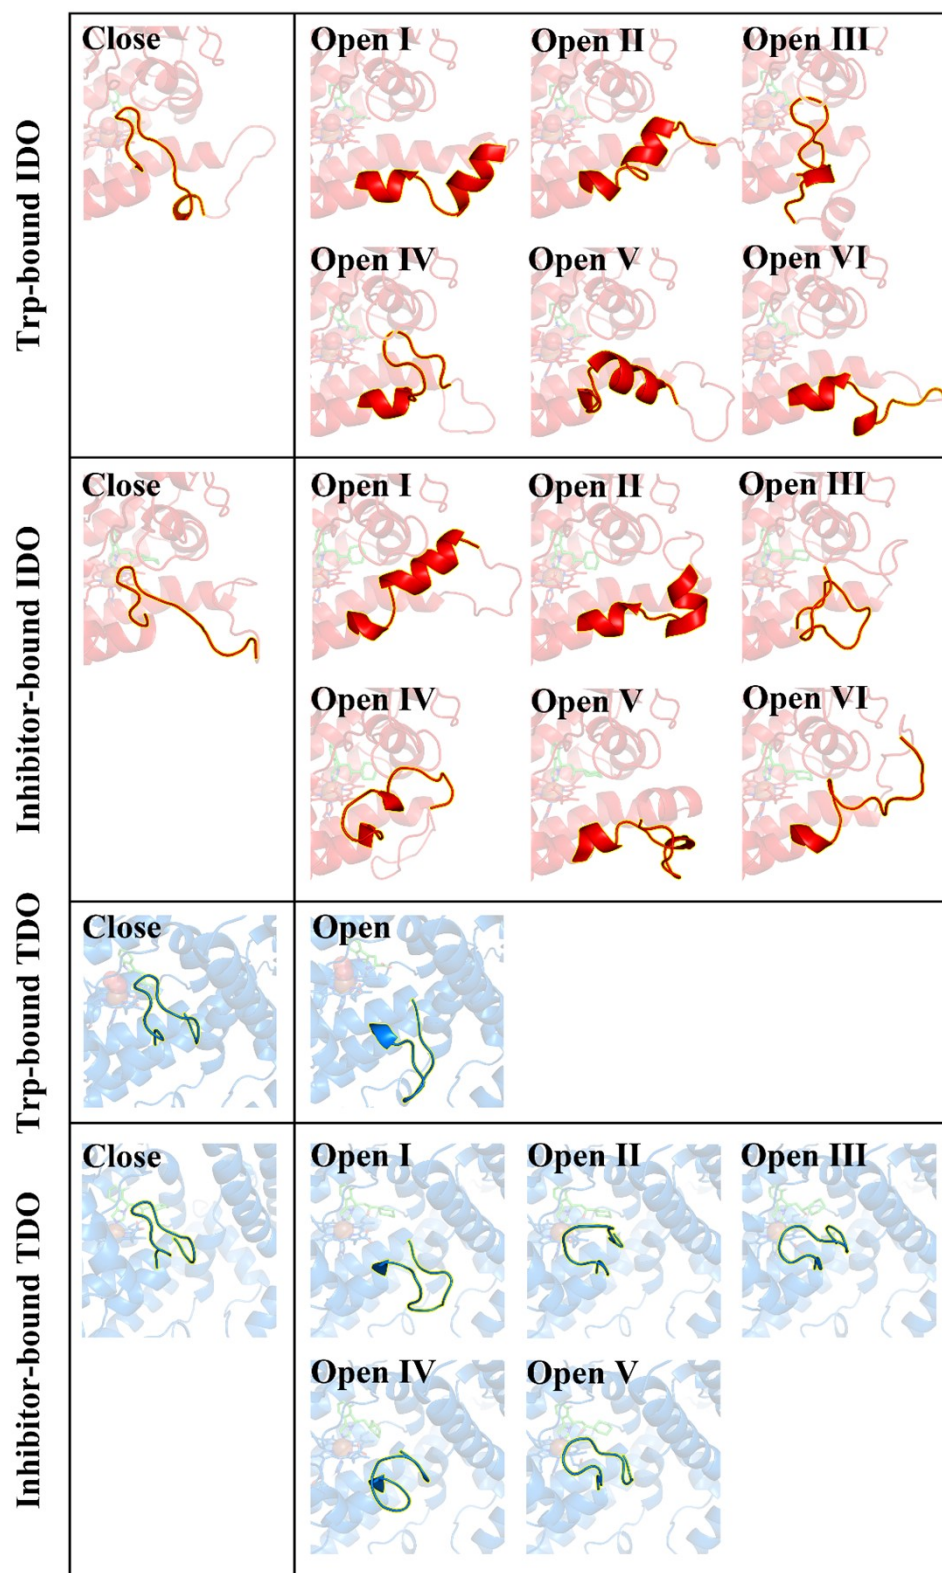

Figure S12: The representative conformations of Trp- and C1 inhibitor-bound IDO/TDO.

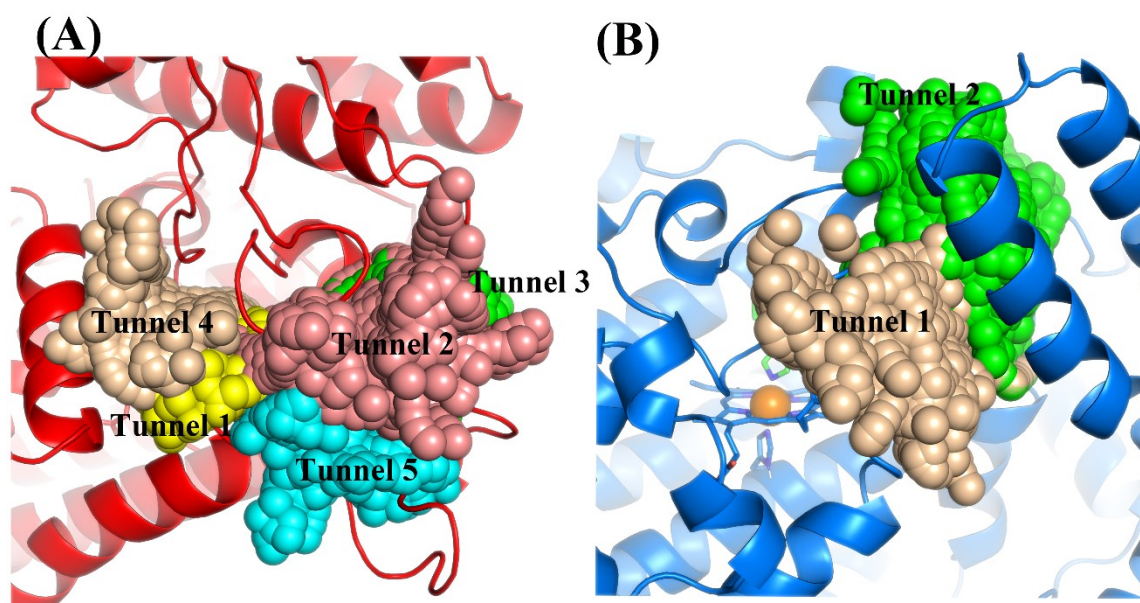

Figure S13: Molecular tunnel scanning results of IDO and TDO. In Figures (A) and (B), IDO and TDO are shown as red cartoon models and blue cartoon models, respectively. Molecular tunnels are sorted by orientation and displayed in different colors. The size and bottleneck of each molecular tunnel are shown in Supplementary Table 5.

Table S1: The volume and surface area of the active pockets of IDO and TDO. To evaluate the effect of the inhibitors binding on the structure of the active pockets, as well as the flexibility of the active pockets, we measured the volume and surface area of the pockets of the two enzymes using the POVME 2.0 program based on the snapshots of proteins extracted from 80-100 ns MD trajectory of each enzyme-inhibitor complex. When the two enzymes bind to the substrate tryptophan, the volume of the active pockets of IDO and TDO are 123.58 Å<sup>3</sup> and 86.45 Å<sup>3</sup>, while the surface area are 95.91 Å<sup>2</sup> and 74.26 Å<sup>2</sup>, respectively. When the two enzymes bound to the inhibitors, the average volume of the IDO's and TDO's active pocket increased to 169.83 Å<sup>3</sup> and 139.67 Å<sup>3</sup>, while the average surface area increased to 105.11 Å<sup>2</sup> and 94.13 Å<sup>2</sup>. This result implicated that compared with the substrate, the shape and size of the active pockets of both enzymes changed due to conformational rearrangement induced by the inhibitors. Most inhibitors induced an increase in the volume and surface of active pockets, and the active pocket of IDO was always larger than TDO. The active pockets of both enzymes are highly flexible, allowing them to accommodate a wide range of inhibitors.

| Substrate / Inhibitors | IDO                     |                           | TDO                     |                           |
|------------------------|-------------------------|---------------------------|-------------------------|---------------------------|
|                        | VOLUME(Å <sup>3</sup> ) | SURFACE (Å <sup>2</sup> ) | VOLUME(Å <sup>3</sup> ) | SURFACE (Å <sup>2</sup> ) |
| Trp                    | 123.58                  | 95.91                     | 86.45                   | 74.26                     |
| A1                     | 156.77                  | 101.85                    | 99.18                   | 81.21                     |
| A2                     | 69.93                   | 67.24                     | 92.34                   | 79.88                     |
| A3                     | 123.60                  | 89.26                     | 83.19                   | 64.50                     |
| A4                     | 156.02                  | 99.84                     | 84.38                   | 69.00                     |
| A5                     | 183.04                  | 100.93                    | 153.48                  | 87.48                     |
| B1                     | 122.30                  | 80.88                     | 161.72                  | 115.54                    |
| B2                     | 240.62                  | 136.37                    | 182.82                  | 121.35                    |

|                      |               |               |               |               |
|----------------------|---------------|---------------|---------------|---------------|
| <b>B3</b>            | <b>154.82</b> | <b>106.70</b> | <b>174.79</b> | <b>106.07</b> |
| <b>C1</b>            | <b>180.18</b> | <b>107.25</b> | <b>144.52</b> | <b>91.43</b>  |
| <b>C2</b>            | <b>205.24</b> | <b>115.93</b> | <b>151.08</b> | <b>91.50</b>  |
| <b>C3</b>            | <b>176.45</b> | <b>103.34</b> | <b>205.51</b> | <b>115.03</b> |
| <b>C4</b>            | <b>176.90</b> | <b>104.67</b> | <b>136.43</b> | <b>85.53</b>  |
| <b>C5</b>            | <b>165.68</b> | <b>105.06</b> | <b>160.04</b> | <b>86.25</b>  |
| <b>D1</b>            | <b>195.68</b> | <b>119.53</b> | <b>109.34</b> | <b>81.34</b>  |
| <b>D2</b>            | <b>151.27</b> | <b>110.13</b> | <b>178.81</b> | <b>109.25</b> |
| <b>D3</b>            | <b>203.63</b> | <b>122.60</b> | <b>81.86</b>  | <b>64.97</b>  |
| <b>E1</b>            | <b>85.23</b>  | <b>68.88</b>  | <b>67.36</b>  | <b>62.64</b>  |
| <b>F1</b>            | <b>162.94</b> | <b>104.19</b> | <b>150.93</b> | <b>97.31</b>  |
| <b>G1</b>            | <b>188.85</b> | <b>111.94</b> | <b>155.16</b> | <b>94.59</b>  |
| <b>G2</b>            | <b>171.62</b> | <b>101.14</b> | <b>131.54</b> | <b>86.54</b>  |
| <b>G3</b>            | <b>190.59</b> | <b>105.25</b> | <b>135.09</b> | <b>101.87</b> |
| <b>G4</b>            | <b>176.32</b> | <b>102.03</b> | <b>168.05</b> | <b>124.90</b> |
| <b>H1</b>            | <b>179.17</b> | <b>105.38</b> | <b>236.88</b> | <b>136.35</b> |
| <b>Average (A~H)</b> | <b>169.83</b> | <b>105.11</b> | <b>139.67</b> | <b>94.13</b>  |

Note that the average values in the last row of the table are only the average measurements for A ~ H series of inhibitors, excluding the substrate.

Table S2: Hydrogen bond analysis of each IDO- and TDO-inhibitor complex.

| IDO-inhibitor complex |                  |                  |      |         |          |
|-----------------------|------------------|------------------|------|---------|----------|
| Acceptor              | Donor-H          | Donor            | Frac | AvgDist | AvgAng   |
| HEM@O2A               | C1_Inhibitor@H10 | C1_Inhibitor@O1  | 0.86 | 2.63    | 166.13   |
| GLY_262@O             | A2_Inhibitor@H20 | A2_Inhibitor@O7  | 0.86 | 2.69    | 156.23   |
| F1_Inhibitor@O19      | ALA_264@H        | ALA_264@N        | 0.82 | 2.85    | 160.85   |
| A5_Inhibitor@O2       | ARG_231@HE       | ARG_231@NE       | 0.71 | 2.83    | 154.84   |
| HEM@O2A               | B3_Inhibitor@H9  | B3_Inhibitor@N3  | 0.63 | 2.84    | 154.18   |
| GLY_262@O             | B1_Inhibitor@H11 | B1_Inhibitor@N4  | 0.60 | 2.85    | 156.09   |
| HEM@O2A               | B3_Inhibitor@H10 | B3_Inhibitor@N4  | 0.51 | 2.86    | 154.84   |
| HEM@O2A               | C5_Inhibitor@H3  | C5_Inhibitor@O1  | 0.51 | 2.75    | 161.62   |
| H1_Inhibitor@O1       | SER_167@HG       | SER_167@OG       | 0.36 | 2.81    | 157.45   |
| A5_Inhibitor@O2       | ARG_231@HH21     | ARG_231@NH2      | 0.33 | 2.85    | 147.71   |
| HEM_393@O1A           | F1_Inhibitor@H24 | F1_Inhibitor@N23 | 0.31 | 2.85    | 157.44   |
| HEM_393@O2A           | F1_Inhibitor@H24 | F1_Inhibitor@N23 | 0.31 | 2.85    | 157.34   |
| D2_Inhibitor@O23      | GLY_236@H        | GLY_236@N        | 0.26 | 2.88    | 160.46   |
| GLY_262@O             | E1_Inhibitor@H   | E1_Inhibitor@N3  | 0.25 | 2.85    | 163.96   |
| ARG_231@O             | C5_Inhibitor@H31 | C5_Inhibitor@O29 | 0.25 | 2.80    | 158.10   |
| HEM@O1A               | B3_Inhibitor@H9  | B3_Inhibitor@N3  | 0.19 | 2.83    | 153.82   |
| HEM@O1A               | C5_Inhibitor@H3  | C5_Inhibitor@O1  | 0.18 | 2.77    | 162.28   |
| HEM@O1A               | B3_Inhibitor@H10 | B3_Inhibitor@N4  | 0.15 | 2.86    | 153.97   |
| HEM@O1A               | C1_Inhibitor@H10 | C1_Inhibitor@O1  | 0.13 | 2.65    | 164.90   |
| HEM@O2A               | D2_Inhibitor@H21 | D2_Inhibitor@N21 | 0.12 | 2.84    | 156.80   |
| HEM@O1A               | B2_Inhibitor@H18 | B2_Inhibitor@N18 | 0.12 | 2.88    | 147.92   |
| H1_Inhibitor@N5       | SER_235@HG       | SER_235@OG       | 0.10 | 2.86    | 160.96   |
| D2_Inhibitor@O12      | ALA_264@H        | ALA_264@N        | 0.10 | 2.94    | 147.8679 |
| TDO-inhibitor complex |                  |                  |      |         |          |
| Acceptor              | Donor-H          | Donor            | Frac | AvgDist | AvgAng   |
| HEM@O2A               | C1_Inhibitor@H10 | C1_Inhibitor@O1  | 0.97 | 2.66    | 160.01   |
| HEM@O2A               | D1_Inhibitor@H1  | D1_Inhibitor@N3  | 0.84 | 2.84    | 162.54   |
| THR_342@OG1           | A2_Inhibitor@H20 | A2_Inhibitor@O7  | 0.72 | 2.82    | 159.90   |
| H1_Inhibitor@O3       | ARG_144@HE       | ARG_144@NE       | 0.66 | 2.84    | 151.53   |
| HEM@O1A               | C5_Inhibitor@H3  | C5_Inhibitor@O1  | 0.60 | 2.74    | 159.52   |
| THR_342@OG1           | A1_Inhibitor@HN1 | A1_Inhibitor@N1  | 0.54 | 2.89    | 159.54   |
| A5_Inhibitor@O2       | ARG_144@HH21     | ARG_144@NH2      | 0.51 | 2.85    | 155.54   |
| HEM@O2A               | C5_Inhibitor@H3  | C5_Inhibitor@O1  | 0.28 | 2.80    | 161.65   |
| THR_342@OG1           | A3_Inhibitor@H17 | A3_Inhibitor@N11 | 0.26 | 2.89    | 150.51   |
| C5_Inhibitor@O29      | ARG_144@HH21     | ARG_144@NH2      | 0.26 | 2.86    | 149.32   |
| ALA_150@O             | B1_Inhibitor@H11 | B1_Inhibitor@N4  | 0.18 | 2.85    | 146.75   |
| D3_Inhibitor@O27      | GLY_152@H        | GLY_152@N        | 0.12 | 2.93    | 153.97   |
| D3_Inhibitor@N4       | GLY_152@H        | GLY_152@N        | 0.11 | 2.93    | 145.94   |

|                         |                         |                        |             |             |               |
|-------------------------|-------------------------|------------------------|-------------|-------------|---------------|
| <b>B3_Inhibitor@N5</b>  | <b>LYS_339@HZ3</b>      | <b>LYS_339@NZ</b>      | <b>0.10</b> | <b>2.90</b> | <b>154.27</b> |
| <b>THR_342@OG1</b>      | <b>B3_Inhibitor@H10</b> | <b>B3_Inhibitor@N4</b> | <b>0.10</b> | <b>2.91</b> | <b>146.18</b> |
| <b>B1_Inhibitor@O2</b>  | <b>SER_148@HG</b>       | <b>SER_148@OG</b>      | <b>0.10</b> | <b>2.80</b> | <b>156.87</b> |
| <b>B1_Inhibitor@O1</b>  | <b>ARG_144@HE</b>       | <b>ARG_144@NE</b>      | <b>0.10</b> | <b>2.88</b> | <b>157.31</b> |
| <b>D3_Inhibitor@N19</b> | <b>THR_342@HG1</b>      | <b>THR_342@OG1</b>     | <b>0.10</b> | <b>2.88</b> | <b>158.19</b> |

---

Table S3: Cluster analysis results of T-REMD simulation trajectories (T=300.5K) of Trp-bound and inhibitor-bound IDO/TDO.

| Trp-bound IDO (Cutoff value =1.6 Å )       |        |         |       |                            |
|--------------------------------------------|--------|---------|-------|----------------------------|
| Cluster                                    | Frac   | AvgDist | Stdev | Structural characteristics |
| 1                                          | 32.70% | 3.949   | 1.437 | Open I                     |
| 2                                          | 13.70% | 1.234   | 0.932 | Close                      |
| 3                                          | 9.10%  | 1.252   | 0.412 | Open II                    |
| 4                                          | 8.10%  | 1.834   | 0.680 | Open III                   |
| 5                                          | 6.90%  | 1.458   | 0.736 | Open IV                    |
| 6                                          | 6.70%  | 1.440   | 0.424 | Open V                     |
| 7                                          | 6.00%  | 1.847   | 0.581 | Open VI                    |
| 8                                          | 2.50%  | 1.073   | 0.497 | -                          |
| 9                                          | 2.40%  | 0.732   | 0.211 | -                          |
| 10                                         | 2.00%  | 1.495   | 0.580 | -                          |
| 11                                         | 1.50%  | 1.690   | 0.586 | -                          |
| 12                                         | 1.20%  | 0.984   | 0.363 | -                          |
| 13                                         | 1.10%  | 2.096   | 0.740 | -                          |
| 14                                         | 0.70%  | 2.020   | 0.801 | -                          |
| 15                                         | 0.50%  | 0.802   | 0.414 | -                          |
| 16                                         | 0.50%  | 1.585   | 0.717 | -                          |
| 17                                         | 0.40%  | 1.060   | 0.319 | -                          |
| 18                                         | 0.30%  | 1.431   | 0.640 | -                          |
| 19                                         | 0.20%  | 1.178   | 0.559 | -                          |
| 20                                         | 0.20%  | 0.699   | 0.178 | -                          |
| 21                                         | 0.20%  | 1.568   | 0.565 | -                          |
| 22                                         | 0.20%  | 1.183   | 0.466 | -                          |
| 23                                         | 0.20%  | 1.417   | 0.492 | -                          |
| 24                                         | 0.10%  | 1.522   | 0.517 | -                          |
| 25                                         | 0.10%  | 1.469   | 0.422 | -                          |
| 26                                         | 0.10%  | 1.048   | 0.326 | -                          |
| 27                                         | 0.10%  | 1.016   | 0.512 | -                          |
| Inhibitor-bound IDO (Cutoff value =1.6 Å ) |        |         |       |                            |
| Cluster                                    | Frac   | AvgDist | Stdev | Structural characteristics |
| 1                                          | 29.10% | 3.525   | 1.495 | Open I                     |
| 2                                          | 12.90% | 1.527   | 0.635 | Open II                    |
| 3                                          | 11.40% | 0.873   | 0.298 | Open III                   |
| 4                                          | 10.80% | 1.707   | 0.842 | Open IV                    |
| 5                                          | 9.30%  | 1.210   | 0.561 | Close                      |
| 6                                          | 7.60%  | 1.712   | 0.768 | Open V                     |
| 7                                          | 3.50%  | 2.480   | 0.979 | Open VI                    |

| 8                                                 | 2.20%  | 1.262   | 0.523 | -                          |
|---------------------------------------------------|--------|---------|-------|----------------------------|
| 9                                                 | 2.20%  | 1.710   | 0.763 | -                          |
| 10                                                | 1.70%  | 1.548   | 0.639 | -                          |
| 11                                                | 1.20%  | 1.403   | 0.546 | -                          |
| 12                                                | 1.10%  | 1.260   | 0.442 | -                          |
| 13                                                | 1.00%  | 1.710   | 0.633 | -                          |
| 14                                                | 1.00%  | 1.327   | 0.569 | -                          |
| 15                                                | 0.70%  | 1.194   | 0.407 | -                          |
| 16                                                | 0.50%  | 1.632   | 0.622 | -                          |
| 17                                                | 0.30%  | 1.463   | 0.507 | -                          |
| 18                                                | 0.30%  | 0.831   | 0.244 | -                          |
| 19                                                | 0.30%  | 1.663   | 0.523 | -                          |
| 20                                                | 0.20%  | 1.033   | 0.694 | -                          |
| 21                                                | 0.20%  | 1.180   | 0.350 | -                          |
| 22                                                | 0.20%  | 1.526   | 0.449 | -                          |
| 23                                                | 0.20%  | 1.634   | 0.473 | -                          |
| <b>Trp-bound TDO (Cutoff value =0.5 Å )</b>       |        |         |       |                            |
| Cluster                                           | Frac   | AvgDist | Stdev | Structural characteristics |
| 1                                                 | 96.50% | 0.346   | 0.064 | Close                      |
| 2                                                 | 3.00%  | 0.593   | 0.180 | Open                       |
| 3                                                 | 0.20%  | 0.506   | 0.120 | -                          |
| 4                                                 | 0.10%  | 0.515   | 0.111 | -                          |
| <b>Inhibitor-bound TDO (Cutoff value =0.5 Å )</b> |        |         |       |                            |
| Cluster                                           | Frac   | AvgDist | Stdev | Structural characteristics |
| 1                                                 | 56.60% | 0.619   | 0.286 | Close                      |
| 2                                                 | 14.60% | 0.607   | 0.189 | Open I                     |
| 3                                                 | 8.10%  | 0.705   | 0.176 | Open II                    |
| 4                                                 | 4.80%  | 0.460   | 0.106 | Open III                   |
| 5                                                 | 4.70%  | 0.743   | 0.223 | Open IV                    |
| 6                                                 | 3.20%  | 0.546   | 0.146 | Open V                     |
| 7                                                 | 1.40%  | 0.736   | 0.199 | -                          |
| 8                                                 | 1.20%  | 0.714   | 0.180 | -                          |
| 9                                                 | 0.90%  | 0.548   | 0.156 | -                          |
| 10                                                | 0.40%  | 0.432   | 0.087 | -                          |
| 11                                                | 0.30%  | 0.595   | 0.123 | -                          |
| 12                                                | 0.30%  | 0.587   | 0.148 | -                          |
| 13                                                | 0.20%  | 0.564   | 0.130 | -                          |
| 14                                                | 0.20%  | 0.472   | 0.089 | -                          |
| 15                                                | 0.20%  | 0.572   | 0.122 | -                          |
| 16                                                | 0.20%  | 0.577   | 0.108 | -                          |
| 17                                                | 0.10%  | 0.520   | 0.110 | -                          |
| 18                                                | 0.10%  | 0.460   | 0.104 | -                          |
| 19                                                | 0.10%  | 0.484   | 0.104 | -                          |

Table S4: The binding free energies of the inhibitor with each representative conformation of IDO/TDO, the volume and surface area of the IDO/TDO active pocket, and the solvent-accessible surface area (SASA) of the inhibitor.

| <b>IDO</b>      | <b>MM/GBSA (kcal/mol)</b> | <b>VOLUME (Å<sup>3</sup>)</b> | <b>SURFACE (Å<sup>2</sup>)</b> | <b>SASA (Å<sup>2</sup>)</b> |
|-----------------|---------------------------|-------------------------------|--------------------------------|-----------------------------|
| <b>Close</b>    | <b>-49.12</b>             | <b>164.09</b>                 | <b>174.59</b>                  | <b>36.64</b>                |
| <b>Open I</b>   | <b>-44.80</b>             | <b>197.94</b>                 | <b>194.90</b>                  | <b>54.40</b>                |
| <b>Open II</b>  | <b>-43.59</b>             | <b>200.89</b>                 | <b>205.19</b>                  | <b>56.86</b>                |
| <b>Open III</b> | <b>-45.11</b>             | <b>201.47</b>                 | <b>214.36</b>                  | <b>52.90</b>                |
| <b>Open IV</b>  | <b>-46.65</b>             | <b>189.16</b>                 | <b>189.13</b>                  | <b>20.20</b>                |
| <b>Open V</b>   | <b>-42.25</b>             | <b>186.08</b>                 | <b>181.49</b>                  | <b>55.41</b>                |
| <b>Open VI</b>  | <b>-45.06</b>             | <b>199.34</b>                 | <b>197.40</b>                  | <b>44.12</b>                |
| <b>TDO</b>      | <b>MM/GBSA (kcal/mol)</b> | <b>VOLUME (Å<sup>3</sup>)</b> | <b>SURFACE (Å<sup>2</sup>)</b> | <b>SASA (Å<sup>2</sup>)</b> |
| <b>Close</b>    | <b>-48.02</b>             | <b>150.42</b>                 | <b>152.73</b>                  | <b>26.79</b>                |
| <b>Open I</b>   | <b>-36.76</b>             | <b>267.69</b>                 | <b>200.18</b>                  | <b>70.24</b>                |
| <b>Open II</b>  | <b>-46.01</b>             | <b>175.61</b>                 | <b>177.85</b>                  | <b>30.88</b>                |
| <b>Open III</b> | <b>-45.23</b>             | <b>196.59</b>                 | <b>186.07</b>                  | <b>30.29</b>                |
| <b>Open IV</b>  | <b>-42.10</b>             | <b>247.23</b>                 | <b>213.79</b>                  | <b>61.76</b>                |
| <b>Open V</b>   | <b>-47.65</b>             | <b>155.50</b>                 | <b>166.93</b>                  | <b>28.91</b>                |

Table S5: The size and bottleneck of each molecular tunnel of IDO and TDO.

Molecular tunnels in different directions are marked with different colors.

| IDO      | ID       | Avg_BR (Å) | Max_BR (Å) | Avg_L (Å) |
|----------|----------|------------|------------|-----------|
| Open I   | Tunnel 1 | 2.68       | 3.11       | 13.03     |
|          | Tunnel 2 | 1.97       | 2.91       | 18.50     |
|          | Tunnel 4 | 1.58       | 2.32       | 18.82     |
| Open II  | Tunnel 1 | 2.54       | 2.93       | 15.22     |
|          | Tunnel 4 | 1.37       | 2.06       | 21.86     |
|          | Tunnel 5 | 1.25       | 1.69       | 22.99     |
| Open III | Tunnel 4 | 1.76       | 2.40       | 18.39     |
|          | Tunnel 5 | 1.45       | 2.13       | 18.49     |
|          | Tunnel 3 | 1.21       | 1.55       | 27.42     |
| Open IV  | Tunnel 4 | 1.68       | 2.15       | 16.44     |
| Open V   | Tunnel 2 | 2.56       | 3.12       | 21.76     |
|          | Tunnel 1 | 2.26       | 2.97       | 12.95     |
|          | Tunnel 3 | 2.21       | 2.88       | 22.64     |
| Open VI  | Tunnel 1 | 2.33       | 2.80       | 16.03     |
|          | Tunnel 2 | 2.00       | 2.51       | 24.81     |
|          | Tunnel 5 | 1.72       | 2.58       | 20.46     |
| Close    | Tunnel 3 | 2.10       | 2.77       | 18.88     |
|          | Tunnel 2 | 1.94       | 2.61       | 18.34     |
| TDO      | ID       | Avg_BR(Å)  | Max_BR(Å)  | Avg_L(Å)  |
| Open I   | Tunnel 1 | 2.43       | 3.12       | 10.36     |
|          | Tunnel 2 | 1.83       | 2.66       | 25.91     |
| Open II  | Tunnel 2 | 1.35       | 1.80       | 22.50     |
| Open III | Tunnel 1 | 1.87       | 2.78       | 16.68     |
|          | Tunnel 2 | 2.01       | 2.64       | 24.39     |
| Open IV  | Tunnel 1 | 2.18       | 3.07       | 16.88     |
|          | Tunnel 2 | 2.00       | 2.56       | 25.55     |
| Open VI  | Tunnel 1 | 2.18       | 2.78       | 10.63     |
|          | Tunnel 2 | 2.12       | 2.74       | 18.26     |
| Close    | Tunnel 2 | 1.59       | 2.27       | 23.18     |
|          | Tunnel 1 | 1.40       | 2.17       | 18.14     |

Table S6: Information on the charge and GAFF force field atom types of the inhibitor, porphyrin ring, histidine, and central iron atoms of the metal coordination structure in the C1 inhibitor-IDO complex. In Table, M1 represents the atom type of the ferrous ion, while Y1, Y2, Y3, Y4, Y5, and Y6 denote the atom types of the six atoms bound to the ferrous ion. Y1 is the  $\epsilon$ -nitrogen atom in HID346 ( $\delta$ -nitrogen protonated histidine at 346 of the residue sequence), Y2~Y5 are the four nitrogen atoms in the porphyrin ring coplanar, and Y6 is the electronegative atom of the inhibitor. For other atom types see gaff.dat ("general Amber force field").

| Charge and atom type information for C1 inhibitor |           |           |      |          | Charge and atom type information for the porphyrin ring |           |           |      |          |
|---------------------------------------------------|-----------|-----------|------|----------|---------------------------------------------------------|-----------|-----------|------|----------|
| No.                                               | Atom name | Atom type | Unit | Charge   | No.                                                     | Atom name | Atom type | Unit | Charge   |
| 1                                                 | C1        | cc        | ML1  | -0.14919 | 1                                                       | CHA       | ce        | HM1  | -0.02716 |
| 2                                                 | H1        | h4        | ML1  | 0.143961 | 2                                                       | C4D       | cc        | HM1  | -0.01958 |
| 3                                                 | N1        | Y6        | ML1  | -0.03073 | 3                                                       | ND        | Y2        | HM1  | -0.06948 |
| 4                                                 | C2        | cd        | ML1  | 0.033569 | 4                                                       | C1D       | cd        | HM1  | -0.07517 |
| 5                                                 | H2        | h5        | ML1  | 0.128227 | 5                                                       | C2D       | cd        | HM1  | 0.033427 |
| 6                                                 | N2        | na        | ML1  | 0.057571 | 6                                                       | CMD       | c3        | HM1  | -0.04803 |
| 7                                                 | C3        | cd        | ML1  | -0.00591 | 7                                                       | C3D       | cc        | HM1  | -0.04739 |
| 8                                                 | C4        | ca        | ML1  | 0.015242 | 8                                                       | CAD       | c3        | HM1  | -0.04853 |
| 9                                                 | C5        | ca        | ML1  | -0.13504 | 9                                                       | CBD       | c3        | HM1  | 0.024453 |
| 10                                                | H3        | ha        | ML1  | 0.117286 | 10                                                      | CGD       | c         | HM1  | 0.621962 |
| 11                                                | C6        | ca        | ML1  | -0.21553 | 11                                                      | O2D       | o         | HM1  | -0.72155 |
| 12                                                | H4        | ha        | ML1  | 0.132422 | 12                                                      | O1D       | o         | HM1  | -0.72362 |
| 13                                                | C7        | ca        | ML1  | -0.15278 | 13                                                      | CHD       | ce        | HM1  | -0.079   |
| 14                                                | H5        | ha        | ML1  | 0.115806 | 14                                                      | C4C       | cc        | HM1  | -0.02373 |
| 15                                                | C8        | ca        | ML1  | 0.094165 | 15                                                      | NC        | Y3        | HM1  | -0.15727 |
| 16                                                | F1        | f         | ML1  | -0.15173 | 16                                                      | C1C       | cd        | HM1  | -0.05093 |
| 17                                                | C9        | ca        | ML1  | 0.043792 | 17                                                      | C2C       | cd        | HM1  | 0.020148 |
| 18                                                | C10       | c3        | ML1  | 0.04287  | 18                                                      | CMC       | c3        | HM1  | -0.0489  |
| 19                                                | H6        | h1        | ML1  | 0.101823 | 19                                                      | C3C       | cc        | HM1  | -0.03426 |
| 20                                                | C11       | c3        | ML1  | -0.02622 | 20                                                      | CAC       | ce        | HM1  | -0.12363 |
| 21                                                | H7        | hc        | ML1  | 0.035886 | 21                                                      | CBC       | c2        | HM1  | -0.33989 |
| 22                                                | H8        | hc        | ML1  | 0.035886 | 22                                                      | CHC       | ce        | HM1  | -0.12349 |
| 23                                                | C12       | c3        | ML1  | -0.00522 | 23                                                      | C4B       | cc        | HM1  | -0.03297 |
| 24                                                | H9        | h1        | ML1  | 0.067972 | 24                                                      | NB        | Y4        | HM1  | -0.03576 |
| 25                                                | O1        | oh        | ML1  | -0.45383 | 25                                                      | C1B       | cd        | HM1  | -0.0304  |
| 26                                                | H10       | ho        | ML1  | 0.44652  | 26                                                      | C2B       | cd        | HM1  | 0.088097 |

|                                                      |           |           |      |          |    |      |    |     |          |
|------------------------------------------------------|-----------|-----------|------|----------|----|------|----|-----|----------|
| 27                                                   | C13       | c3        | ML1  | -0.05835 | 27 | CMB  | c3 | HM1 | -0.05242 |
| 28                                                   | H11       | hc        | ML1  | 0.039229 | 28 | C3B  | cc | HM1 | -0.03575 |
| 29                                                   | C14       | c3        | ML1  | -0.04026 | 29 | CAB  | ce | HM1 | -0.08814 |
| 30                                                   | H12       | hc        | ML1  | 0.033994 | 30 | CBB  | c2 | HM1 | -0.40235 |
| 31                                                   | H13       | hc        | ML1  | 0.033994 | 31 | CHB  | ce | HM1 | -0.12595 |
| 32                                                   | C15       | c3        | ML1  | -0.05807 | 32 | C4A  | cc | HM1 | -0.10764 |
| 33                                                   | H14       | hc        | ML1  | 0.00767  | 33 | NA   | Y5 | HM1 | -0.06977 |
| 34                                                   | H15       | hc        | ML1  | 0.00767  | 34 | C1A  | cd | HM1 | 0.003192 |
| 35                                                   | C16       | c3        | ML1  | -0.03471 | 35 | C2A  | cd | HM1 | -0.04401 |
| 36                                                   | H16       | hc        | ML1  | 0.007687 | 36 | CAA  | c3 | HM1 | -0.06975 |
| 37                                                   | H17       | hc        | ML1  | 0.007687 | 37 | CBA  | c3 | HM1 | -0.04464 |
| 38                                                   | C17       | c3        | ML1  | -0.05269 | 38 | CGA  | c  | HM1 | 0.653694 |
| 39                                                   | H18       | hc        | ML1  | 0.014013 | 39 | O2A  | o  | HM1 | -0.74451 |
| 40                                                   | H19       | hc        | ML1  | 0.014013 | 40 | O1A  | o  | HM1 | -0.70439 |
| 41                                                   | C18       | c3        | ML1  | -0.0681  | 41 | C3A  | cc | HM1 | -0.01079 |
| 42                                                   | H20       | hc        | ML1  | 0.059638 | 42 | CMA  | c3 | HM1 | -0.0656  |
| 43                                                   | H21       | hc        | ML1  | 0.059638 | 43 | HMA1 | hc | HM1 | 0.025109 |
| Charge and atom type information for HID346          |           |           |      |          | 44 | HMA2 | hc | HM1 | 0.025109 |
| No.                                                  | Atom name | Atom type | Unit | Charge   | 45 | HMA3 | hc | HM1 | 0.025109 |
| 1                                                    | N         | N         | HD1  | -0.4157  | 46 | HMB1 | hc | HM1 | 0.016713 |
| 2                                                    | H         | H         | HD1  | 0.217882 | 47 | HMB2 | hc | HM1 | 0.016713 |
| 3                                                    | CA        | CX        | HD1  | 0.0188   | 48 | HMB3 | hc | HM1 | 0.016713 |
| 4                                                    | HA        | H1        | HD1  | 0.086938 | 49 | HMC1 | hc | HM1 | 0.012469 |
| 5                                                    | CB        | CT        | HD1  | -0.04681 | 50 | HMC2 | hc | HM1 | 0.012469 |
| 6                                                    | HB2       | HC        | HD1  | 0.05325  | 51 | HMC3 | hc | HM1 | 0.012469 |
| 7                                                    | HB3       | HC        | HD1  | 0.05325  | 52 | HMD1 | hc | HM1 | 0.022149 |
| 8                                                    | CG        | CC        | HD1  | -0.02826 | 53 | HMD2 | hc | HM1 | 0.022149 |
| 9                                                    | ND1       | NA        | HD1  | -0.15049 | 54 | HMD3 | hc | HM1 | 0.022149 |
| 10                                                   | HD1       | H         | HD1  | 0.263405 | 55 | HBB1 | ha | HM1 | 0.136697 |
| 11                                                   | CE1       | CR        | HD1  | 0.031521 | 56 | HBB2 | ha | HM1 | 0.136697 |
| 12                                                   | HE1       | H5        | HD1  | 0.15033  | 57 | HBC1 | ha | HM1 | 0.128085 |
| 13                                                   | NE2       | Y1        | HD1  | -0.07078 | 58 | HBC2 | ha | HM1 | 0.128085 |
| 14                                                   | CD2       | CV        | HD1  | -0.09468 | 59 | HBA1 | hc | HM1 | -0.00583 |
| 15                                                   | HD2       | H4        | HD1  | 0.144649 | 60 | HBA2 | hc | HM1 | -0.00583 |
| 16                                                   | C         | C         | HD1  | 0.5973   | 61 | HAA1 | hc | HM1 | 0.031992 |
| 17                                                   | O         | O         | HD1  | -0.5679  | 62 | HAA2 | hc | HM1 | 0.031992 |
| Charge and atom type information for the ferrous ion |           |           |      |          | 63 | HBD1 | hc | HM1 | -0.03804 |
| No.                                                  | Atom name | Atom type | Unit | Charge   | 64 | HBD2 | hc | HM1 | -0.03804 |
| 1                                                    | FE        | M1        | FE1  | -0.12417 | 65 | HAD1 | hc | HM1 | 0.029354 |
|                                                      |           |           |      |          | 66 | HAD2 | hc | HM1 | 0.029354 |
|                                                      |           |           |      |          | 67 | HHa  | ha | HM1 | 0.145931 |
|                                                      |           |           |      |          | 68 | HHB  | ha | HM1 | 0.167192 |
|                                                      |           |           |      |          | 69 | HHc  | ha | HM1 | 0.128582 |
|                                                      |           |           |      |          | 70 | HHd  | ha | HM1 | 0.116844 |

|  |    |     |    |     |          |
|--|----|-----|----|-----|----------|
|  | 71 | HAB | ha | HM1 | 0.120351 |
|  | 72 | HAC | ha | HM1 | 0.130322 |

Table S7: Bond, angle and dihedral angle parameters of metal coordination structures in the C1 inhibitor-IDO complex.

| MASS           |                                                                  |                                                     |                                                     |
|----------------|------------------------------------------------------------------|-----------------------------------------------------|-----------------------------------------------------|
| Atom type      | Mass                                                             |                                                     |                                                     |
| M1             | 55.85                                                            |                                                     | Fe ion                                              |
| Y1             | 14.01                                                            | 0.53                                                | sp2 N in 5 memb.ring w/LP (HIS,ADE,GUA)             |
| Y2             | 14.01                                                            | 0.53                                                | Sp2 N in non-pure aromatic systems, identical to nc |
| Y3             | 14.01                                                            | 0.53                                                | Sp2 N in non-pure aromatic systems, identical to nc |
| Y4             | 14.01                                                            | 0.53                                                | Sp2 N in non-pure aromatic systems, identical to nc |
| Y5             | 14.01                                                            | 0.53                                                | Sp2 N in non-pure aromatic systems, identical to nc |
| Y6             | 14.01                                                            | 0.53                                                | Sp2 N in non-pure aromatic systems                  |
| BOND           |                                                                  |                                                     |                                                     |
| The definition | The force constant $k_b$<br>(kcal/mol/Å <sup>2</sup> )           | The equilibrium bond length $r_0$<br>(Å)            |                                                     |
| M1-Y6          | 64.8                                                             | 2.0429                                              | Created by Seminario method using MCPB.py           |
| Y1-M1          | 26.3                                                             | 2.0519                                              | Created by Seminario method using MCPB.py           |
| Y2-M1          | 50.6                                                             | 2.0163                                              | Created by Seminario method using MCPB.py           |
| Y3-M1          | 70.6                                                             | 2.0165                                              | Created by Seminario method using MCPB.py           |
| Y4-M1          | 32.1                                                             | 2.0123                                              | Created by Seminario method using MCPB.py           |
| Y5-M1          | 67.2                                                             | 2.0012                                              | Created by Seminario method using MCPB.py           |
| CR-Y1          | 488                                                              | 1.335                                               | JCC,7,(1986),230; HIS                               |
| Y1-CV          | 410                                                              | 1.394                                               | JCC,7,(1986),230; HIS                               |
| Y2-cd          | 441.1                                                            | 1.3694                                              | SOURCE1_SOURCE5 2269                                |
| Y3-cd          | 441.1                                                            | 1.3694                                              | SOURCE1_SOURCE5 2269                                |
| Y4-cd          | 441.1                                                            | 1.3694                                              | SOURCE1_SOURCE5 2269                                |
| Y5-cd          | 441.1                                                            | 1.3694                                              | SOURCE1_SOURCE5 2269                                |
| Y6-cd          | 525.4                                                            | 1.3172                                              | SOURCE3_SOURCE5 4612                                |
| cc-Y2          | 525.4                                                            | 1.3172                                              | SOURCE3_SOURCE5 4612                                |
| cc-Y3          | 525.4                                                            | 1.3172                                              | SOURCE3_SOURCE5 4612                                |
| cc-Y4          | 525.4                                                            | 1.3172                                              | SOURCE3_SOURCE5 4612                                |
| cc-Y5          | 525.4                                                            | 1.3172                                              | SOURCE3_SOURCE5 4612                                |
| cc-Y6          | 441.1                                                            | 1.3694                                              | SOURCE1_SOURCE5 2269                                |
| ANGL           |                                                                  |                                                     |                                                     |
| The definition | The force constant $k_\theta$<br>(kcal/mol/radian <sup>2</sup> ) | The equilibrium angle value $\theta_0$<br>(degrees) |                                                     |
| CR-Y1-M1       | 117.53                                                           | 120.95                                              | Created by Seminario method using MCPB.py           |
| M1-Y1-CV       | 118.12                                                           | 129.42                                              | Created by Seminario method using MCPB.py           |
| M1-Y2-cd       | 142.33                                                           | 125.86                                              | Created by Seminario method using MCPB.py           |
| M1-Y3-cd       | 156.56                                                           | 126.64                                              | Created by Seminario method using MCPB.py           |
| M1-Y4-cd       | 101.57                                                           | 126.74                                              | Created by Seminario method using MCPB.py           |

|          |        |        |                                           |      |        |
|----------|--------|--------|-------------------------------------------|------|--------|
| M1-Y5-cd | 158.94 | 126.82 | Created by Seminario method using MCPB.py |      |        |
| M1-Y6-cc | 117.49 | 125.41 | Created by Seminario method using MCPB.py |      |        |
| M1-Y6-cd | 116.27 | 126.93 | Created by Seminario method using MCPB.py |      |        |
| Y1-M1-Y2 | 142.7  | 84.63  | Created by Seminario method using MCPB.py |      |        |
| Y1-M1-Y3 | 126.24 | 90.41  | Created by Seminario method using MCPB.py |      |        |
| Y1-M1-Y4 | 124.43 | 92.48  | Created by Seminario method using MCPB.py |      |        |
| Y1-M1-Y5 | 118.29 | 92.09  | Created by Seminario method using MCPB.py |      |        |
| Y1-M1-Y6 | 161.24 | 174.93 | Created by Seminario method using MCPB.py |      |        |
| Y2-M1-Y3 | 125.01 | 89.71  | Created by Seminario method using MCPB.py |      |        |
| Y2-M1-Y4 | 119.82 | 177.11 | Created by Seminario method using MCPB.py |      |        |
| Y2-M1-Y5 | 114.18 | 89.76  | Created by Seminario method using MCPB.py |      |        |
| Y2-M1-Y6 | 145.3  | 90.37  | Created by Seminario method using MCPB.py |      |        |
| Y3-M1-Y4 | 160.84 | 90.18  | Created by Seminario method using MCPB.py |      |        |
| Y3-M1-Y5 | 123.28 | 177.38 | Created by Seminario method using MCPB.py |      |        |
| Y3-M1-Y6 | 126.74 | 90.47  | Created by Seminario method using MCPB.py |      |        |
| Y4-M1-Y5 | 144.99 | 90.48  | Created by Seminario method using MCPB.py |      |        |
| Y4-M1-Y6 | 127.75 | 92.52  | Created by Seminario method using MCPB.py |      |        |
| Y5-M1-Y6 | 127.15 | 86.97  | Created by Seminario method using MCPB.py |      |        |
| cc-Y2-M1 | 142.49 | 126.19 | Created by Seminario method using MCPB.py |      |        |
| cc-Y3-M1 | 159.75 | 127.24 | Created by Seminario method using MCPB.py |      |        |
| cc-Y4-M1 | 100.26 | 127.38 | Created by Seminario method using MCPB.py |      |        |
| cc-Y5-M1 | 156.89 | 126.86 | Created by Seminario method using MCPB.py |      |        |
| CC-CV-Y1 | 70     | 120    | AA his                                    |      |        |
| CR-Y1-CV | 70     | 117    | AA his                                    |      |        |
| NA-CR-Y1 | 70     | 120    | AA his                                    |      |        |
| Y1-CR-H5 | 50     | 120    | AA his                                    |      |        |
| Y1-CV-H4 | 50     | 120    | AA his                                    |      |        |
| Y2-cd-cd | 67.63  | 121.98 | CORR_SOURCE5                              | 141  | 1.9633 |
| Y2-cd-cc | 68.67  | 123.98 | SOURCE4_SOURCE5                           | 10   | 2.4097 |
| Y3-cd-cd | 67.63  | 121.98 | CORR_SOURCE5                              | 141  | 1.9633 |
| Y3-cd-cc | 68.67  | 123.98 | SOURCE4_SOURCE5                           | 10   | 2.4097 |
| Y4-cd-cd | 67.63  | 121.98 | CORR_SOURCE5                              | 141  | 1.9633 |
| Y4-cd-cc | 68.67  | 123.98 | SOURCE4_SOURCE5                           | 10   | 2.4097 |
| Y5-cd-cd | 67.63  | 121.98 | CORR_SOURCE5                              | 141  | 1.9633 |
| Y6-cc-h4 | 49.97  | 121.14 | SOURCE3_SOURCE5                           | 574  | 0.5658 |
| Y6-cd-h5 | 50.58  | 125.52 | SOURCE3_SOURCE5                           | 1309 | 0.7276 |
| Y6-cd-na | 74.9   | 112.22 | SOURCE3_SOURCE5                           | 2726 | 1.5103 |
| cc-Y2-cd | 71.76  | 105.49 | CORR_SOURCE5                              | 1810 | 1.9032 |
| cc-Y3-cd | 71.76  | 105.49 | CORR_SOURCE5                              | 1810 | 1.9032 |
| cc-Y4-cd | 71.76  | 105.49 | CORR_SOURCE5                              | 1810 | 1.9032 |
| cc-Y5-cd | 71.76  | 105.49 | CORR_SOURCE5                              | 1810 | 1.9032 |
| cc-Y6-cd | 71.76  | 105.49 | CORR_SOURCE5                              | 1810 | 1.9032 |
| cc-cc-Y2 | 71.57  | 112.56 | SOURCE3                                   | 141  | 4.2871 |
| cc-cc-Y3 | 71.57  | 112.56 | SOURCE3                                   | 141  | 4.2871 |

|          |       |        |                 |      |        |
|----------|-------|--------|-----------------|------|--------|
| cc-cc-Y4 | 71.57 | 112.56 | SOURCE3         | 141  | 4.2871 |
| cc-cc-Y5 | 71.57 | 112.56 | SOURCE3         | 141  | 4.2871 |
| cd-cc-Y6 | 72.17 | 111.65 | CORR_SOURCE5    | 1656 | 1.8430 |
| ce-cc-Y2 | 68.07 | 121.7  | CORR_SOURCE5    | 58   | 1.4179 |
| ce-cc-Y3 | 68.07 | 121.7  | CORR_SOURCE5    | 58   | 1.4179 |
| ce-cc-Y4 | 68.07 | 121.7  | CORR_SOURCE5    | 58   | 1.4179 |
| ce-cc-Y5 | 68.07 | 121.7  | CORR_SOURCE5    | 58   | 1.4179 |
| ce-cd-Y5 | 68.67 | 123.98 | SOURCE4_SOURCE5 | 10   | 2.4097 |

#### DIHE

| The definition | The divider | The torsion<br>barrier term $V_n$<br>(kcal/mol) | The phase $\gamma$<br>(degrees) | The<br>periodicity<br>n |                             |
|----------------|-------------|-------------------------------------------------|---------------------------------|-------------------------|-----------------------------|
| X -CR-Y1-X     | 2           | 10                                              | 180                             | 2                       | JCC,7,(1986),230            |
| X -CV-Y1-X     | 2           | 4.8                                             | 180                             | 2                       | JCC,7,(1986),230            |
| X -Y2-cd-X     | 2           | 9.5                                             | 180                             | 2                       | statistiv value from parm94 |
| X -Y3-cd-X     | 2           | 9.5                                             | 180                             | 2                       | statistiv value from parm94 |
| X -Y4-cd-X     | 2           | 9.5                                             | 180                             | 2                       | statistiv value from parm94 |
| X -Y6-cc-X     | 2           | 9.5                                             | 180                             | 2                       | statistic value from parm94 |
| X -Y6-cd-X     | 2           | 9.5                                             | 180                             | 2                       | statistiv value from parm94 |
| X -cc-Y2-X     | 2           | 9.5                                             | 180                             | 2                       | statistic value from parm94 |
| X -cc-Y3-X     | 2           | 9.5                                             | 180                             | 2                       | statistic value from parm94 |
| X -cc-Y4-X     | 2           | 9.5                                             | 180                             | 2                       | statistic value from parm94 |
| X -cc-Y5-X     | 2           | 9.5                                             | 180                             | 2                       | statistic value from parm94 |
| X -cd-Y5-X     | 2           | 9.5                                             | 180                             | 2                       | statistiv value from parm94 |
| CC-CV-Y1-M1    | 3           | 0                                               | 0                               | 3                       | Treat as zero by MCPB.py    |
| CR-Y1-M1-Y2    | 3           | 0                                               | 0                               | 3                       | Treat as zero by MCPB.py    |
| CR-Y1-M1-Y3    | 3           | 0                                               | 0                               | 3                       | Treat as zero by MCPB.py    |
| CR-Y1-M1-Y4    | 3           | 0                                               | 0                               | 3                       | Treat as zero by MCPB.py    |
| CR-Y1-M1-Y5    | 3           | 0                                               | 0                               | 3                       | Treat as zero by MCPB.py    |
| CR-Y1-M1-Y6    | 3           | 0                                               | 0                               | 3                       | Treat as zero by MCPB.py    |
| M1-Y1-CR-H5    | 3           | 0                                               | 0                               | 3                       | Treat as zero by MCPB.py    |
| M1-Y1-CV-H4    | 3           | 0                                               | 0                               | 3                       | Treat as zero by MCPB.py    |
| M1-Y2-cd-cd    | 3           | 0                                               | 0                               | 3                       | Treat as zero by MCPB.py    |
| M1-Y2-cd-ce    | 3           | 0                                               | 0                               | 3                       | Treat as zero by MCPB.py    |
| M1-Y3-cd-cd    | 3           | 0                                               | 0                               | 3                       | Treat as zero by MCPB.py    |
| M1-Y3-cd-ce    | 3           | 0                                               | 0                               | 3                       | Treat as zero by MCPB.py    |
| M1-Y4-cd-cd    | 3           | 0                                               | 0                               | 3                       | Treat as zero by MCPB.py    |
| M1-Y4-cd-ce    | 3           | 0                                               | 0                               | 3                       | Treat as zero by MCPB.py    |
| M1-Y5-cd-cd    | 3           | 0                                               | 0                               | 3                       | Treat as zero by MCPB.py    |
| M1-Y6-cc-cd    | 3           | 0                                               | 0                               | 3                       | Treat as zero by MCPB.py    |
| M1-Y6-cc-h4    | 3           | 0                                               | 0                               | 3                       | Treat as zero by MCPB.py    |
| M1-Y6-cd-h5    | 3           | 0                                               | 0                               | 3                       | Treat as zero by MCPB.py    |
| M1-Y6-cd-na    | 3           | 0                                               | 0                               | 3                       | Treat as zero by MCPB.py    |
| NA-CR-Y1-M1    | 3           | 0                                               | 0                               | 3                       | Treat as zero by MCPB.py    |

|             |   |   |     |   |                          |
|-------------|---|---|-----|---|--------------------------|
| Y1-M1-Y2-cc | 3 | 0 | 0   | 3 | Treat as zero by MCPB.py |
| Y1-M1-Y2-cd | 3 | 0 | 0   | 3 | Treat as zero by MCPB.py |
| Y1-M1-Y3-cc | 3 | 0 | 0   | 3 | Treat as zero by MCPB.py |
| Y1-M1-Y3-cd | 3 | 0 | 0   | 3 | Treat as zero by MCPB.py |
| Y1-M1-Y4-cc | 3 | 0 | 0   | 3 | Treat as zero by MCPB.py |
| Y1-M1-Y4-cd | 3 | 0 | 0   | 3 | Treat as zero by MCPB.py |
| Y1-M1-Y5-cc | 3 | 0 | 0   | 3 | Treat as zero by MCPB.py |
| Y1-M1-Y5-cd | 3 | 0 | 0   | 3 | Treat as zero by MCPB.py |
| Y1-M1-Y6-cc | 3 | 0 | 0   | 3 | Treat as zero by MCPB.py |
| Y1-M1-Y6-cd | 3 | 0 | 0   | 3 | Treat as zero by MCPB.py |
| Y2-M1-Y1-CV | 3 | 0 | 0   | 3 | Treat as zero by MCPB.py |
| Y2-M1-Y3-cc | 3 | 0 | 0   | 3 | Treat as zero by MCPB.py |
| Y2-M1-Y3-cd | 3 | 0 | 0   | 3 | Treat as zero by MCPB.py |
| Y2-M1-Y4-cc | 3 | 0 | 0   | 3 | Treat as zero by MCPB.py |
| Y2-M1-Y4-cd | 3 | 0 | 0   | 3 | Treat as zero by MCPB.py |
| Y2-M1-Y5-cc | 3 | 0 | 0   | 3 | Treat as zero by MCPB.py |
| Y2-M1-Y5-cd | 3 | 0 | 0   | 3 | Treat as zero by MCPB.py |
| Y2-M1-Y6-cc | 3 | 0 | 0   | 3 | Treat as zero by MCPB.py |
| Y2-M1-Y6-cd | 3 | 0 | 0   | 3 | Treat as zero by MCPB.py |
| Y2-cd-ce-cc | 1 | 1 | 180 | 2 | same as X -ce-ce-X       |
| Y2-cd-ce-ha | 1 | 1 | 180 | 2 | same as X -ce-ce-X       |
| Y3-M1-Y1-CV | 3 | 0 | 0   | 3 | Treat as zero by MCPB.py |
| Y3-M1-Y2-cd | 3 | 0 | 0   | 3 | Treat as zero by MCPB.py |
| Y3-M1-Y4-cc | 3 | 0 | 0   | 3 | Treat as zero by MCPB.py |
| Y3-M1-Y4-cd | 3 | 0 | 0   | 3 | Treat as zero by MCPB.py |
| Y3-M1-Y5-cc | 3 | 0 | 0   | 3 | Treat as zero by MCPB.py |
| Y3-M1-Y5-cd | 3 | 0 | 0   | 3 | Treat as zero by MCPB.py |
| Y3-M1-Y6-cc | 3 | 0 | 0   | 3 | Treat as zero by MCPB.py |
| Y3-M1-Y6-cd | 3 | 0 | 0   | 3 | Treat as zero by MCPB.py |
| Y3-cd-ce-cc | 1 | 1 | 180 | 2 | same as X -ce-ce-X       |
| Y3-cd-ce-ha | 1 | 1 | 180 | 2 | same as X -ce-ce-X       |
| Y4-M1-Y1-CV | 3 | 0 | 0   | 3 | Treat as zero by MCPB.py |
| Y4-M1-Y2-cd | 3 | 0 | 0   | 3 | Treat as zero by MCPB.py |
| Y4-M1-Y3-cd | 3 | 0 | 0   | 3 | Treat as zero by MCPB.py |
| Y4-M1-Y5-cc | 3 | 0 | 0   | 3 | Treat as zero by MCPB.py |
| Y4-M1-Y5-cd | 3 | 0 | 0   | 3 | Treat as zero by MCPB.py |
| Y4-M1-Y6-cc | 3 | 0 | 0   | 3 | Treat as zero by MCPB.py |
| Y4-M1-Y6-cd | 3 | 0 | 0   | 3 | Treat as zero by MCPB.py |
| Y4-cd-ce-cc | 1 | 1 | 180 | 2 | same as X -ce-ce-X       |
| Y4-cd-ce-ha | 1 | 1 | 180 | 2 | same as X -ce-ce-X       |
| Y5-M1-Y1-CV | 3 | 0 | 0   | 3 | Treat as zero by MCPB.py |
| Y5-M1-Y2-cd | 3 | 0 | 0   | 3 | Treat as zero by MCPB.py |
| Y5-M1-Y3-cd | 3 | 0 | 0   | 3 | Treat as zero by MCPB.py |
| Y5-M1-Y4-cd | 3 | 0 | 0   | 3 | Treat as zero by MCPB.py |

|             |   |   |     |   |                          |
|-------------|---|---|-----|---|--------------------------|
| Y5-M1-Y6-cc | 3 | 0 | 0   | 3 | Treat as zero by MCPB.py |
| Y5-M1-Y6-cd | 3 | 0 | 0   | 3 | Treat as zero by MCPB.py |
| Y5-cd-ce-cc | 1 | 1 | 180 | 2 | same as X -ce-ce-X       |
| Y6-M1-Y1-CV | 3 | 0 | 0   | 3 | Treat as zero by MCPB.py |
| Y6-M1-Y2-cd | 3 | 0 | 0   | 3 | Treat as zero by MCPB.py |
| Y6-M1-Y3-cd | 3 | 0 | 0   | 3 | Treat as zero by MCPB.py |
| Y6-M1-Y4-cd | 3 | 0 | 0   | 3 | Treat as zero by MCPB.py |
| Y6-M1-Y5-cd | 3 | 0 | 0   | 3 | Treat as zero by MCPB.py |
| cc-Y2-M1-Y3 | 3 | 0 | 0   | 3 | Treat as zero by MCPB.py |
| cc-Y2-M1-Y4 | 3 | 0 | 0   | 3 | Treat as zero by MCPB.py |
| cc-Y2-M1-Y5 | 3 | 0 | 0   | 3 | Treat as zero by MCPB.py |
| cc-Y2-M1-Y6 | 3 | 0 | 0   | 3 | Treat as zero by MCPB.py |
| cc-Y3-M1-Y4 | 3 | 0 | 0   | 3 | Treat as zero by MCPB.py |
| cc-Y3-M1-Y5 | 3 | 0 | 0   | 3 | Treat as zero by MCPB.py |
| cc-Y3-M1-Y6 | 3 | 0 | 0   | 3 | Treat as zero by MCPB.py |
| cc-Y4-M1-Y5 | 3 | 0 | 0   | 3 | Treat as zero by MCPB.py |
| cc-Y4-M1-Y6 | 3 | 0 | 0   | 3 | Treat as zero by MCPB.py |
| cc-Y5-M1-Y6 | 3 | 0 | 0   | 3 | Treat as zero by MCPB.py |
| cc-cc-Y2-M1 | 3 | 0 | 0   | 3 | Treat as zero by MCPB.py |
| cc-cc-Y3-M1 | 3 | 0 | 0   | 3 | Treat as zero by MCPB.py |
| cc-cc-Y4-M1 | 3 | 0 | 0   | 3 | Treat as zero by MCPB.py |
| cc-cc-Y5-M1 | 3 | 0 | 0   | 3 | Treat as zero by MCPB.py |
| cd-ce-cc-Y2 | 1 | 1 | 180 | 2 | same as X -ce-ce-X       |
| cd-ce-cc-Y3 | 1 | 1 | 180 | 2 | same as X -ce-ce-X       |
| cd-ce-cc-Y4 | 1 | 1 | 180 | 2 | same as X -ce-ce-X       |
| cd-ce-cc-Y5 | 1 | 1 | 180 | 2 | same as X -ce-ce-X       |
| ce-cc-Y2-M1 | 3 | 0 | 0   | 3 | Treat as zero by MCPB.py |
| ce-cc-Y3-M1 | 3 | 0 | 0   | 3 | Treat as zero by MCPB.py |
| ce-cc-Y4-M1 | 3 | 0 | 0   | 3 | Treat as zero by MCPB.py |
| ce-cc-Y5-M1 | 3 | 0 | 0   | 3 | Treat as zero by MCPB.py |
| ce-cd-Y5-M1 | 3 | 0 | 0   | 3 | Treat as zero by MCPB.py |
| ha-ce-cc-Y2 | 1 | 1 | 180 | 2 | same as X -ce-ce-X       |
| ha-ce-cc-Y3 | 1 | 1 | 180 | 2 | same as X -ce-ce-X       |
| ha-ce-cc-Y4 | 1 | 1 | 180 | 2 | same as X -ce-ce-X       |
| ha-ce-cc-Y5 | 1 | 1 | 180 | 2 | same as X -ce-ce-X       |
| ha-ce-cd-Y5 | 1 | 1 | 180 | 2 | same as X -ce-ce-X       |

Table S8: Additional dihedral angle parameters of the inhibitor and porphyrin ring in the C1 inhibitor-IDO complex.

| C1 inhibitor (DIHE)   |             |                                           |                              |                     |                    |
|-----------------------|-------------|-------------------------------------------|------------------------------|---------------------|--------------------|
| The definition        | The divider | The torsion barrier term $V_n$ (kcal/mol) | The phase $\gamma$ (degrees) | The periodicity $n$ |                    |
| cc-cd-ca-ca           | 1           | 0.7                                       | 180                          | 2                   | same as X -c2-ca-X |
| na-cd-ca-ca           | 1           | 0.7                                       | 180                          | 2                   | same as X -c2-ca-X |
| Porphyrin ring (DIHE) |             |                                           |                              |                     |                    |
| The definition        | The divider | The torsion barrier term $V_n$ (kcal/mol) | The phase $\gamma$ (degrees) | The periodicity $n$ |                    |
| cc-ce-cd-nd           | 1           | 1                                         | 180                          | 2                   | same as X -ce-ce-X |
| cc-ce-cd-cd           | 1           | 1                                         | 180                          | 2                   | same as X -ce-ce-X |
| nd-cc-ce-cd           | 1           | 1                                         | 180                          | 2                   | same as X -ce-ce-X |
| nd-cc-ce-ha           | 1           | 1                                         | 180                          | 2                   | same as X -ce-ce-X |
| nd-cd-ce-ha           | 1           | 1                                         | 180                          | 2                   | same as X -ce-ce-X |
| cd-ce-cc-cc           | 1           | 1                                         | 180                          | 2                   | same as X -ce-ce-X |
| cd-cd-ce-ha           | 1           | 1                                         | 180                          | 2                   | same as X -ce-ce-X |
| cc-cc-ce-ha           | 1           | 1                                         | 180                          | 2                   | same as X -ce-ce-X |
| cc-cc-ce-c2           | 1           | 1                                         | 180                          | 2                   | same as X -ce-ce-X |
| cd-cc-ce-c2           | 1           | 1                                         | 180                          | 2                   | same as X -ce-ce-X |
| cd-cc-ce-ha           | 1           | 1                                         | 180                          | 2                   | same as X -ce-ce-X |
